# Supplementary material
Source: PubMed Central journal article supplement (PMC3694689)
Supplement: supp_tpc.113.112235_tpc112235SupplementalRev.pdf [file supp_tpc.113.112235_tpc112235SupplementalRev.pdf]

**Comprehensive Protein-Based Artificial microRNA Screens  
for Effective Gene Silencing in Plants**

Jian-Feng Li, Hoo Sun Chung, Yajie Niu, Jenifer Bush, Matthew McCormack and  
Jen Sheen

**SUPPLEMENTAL DATA**

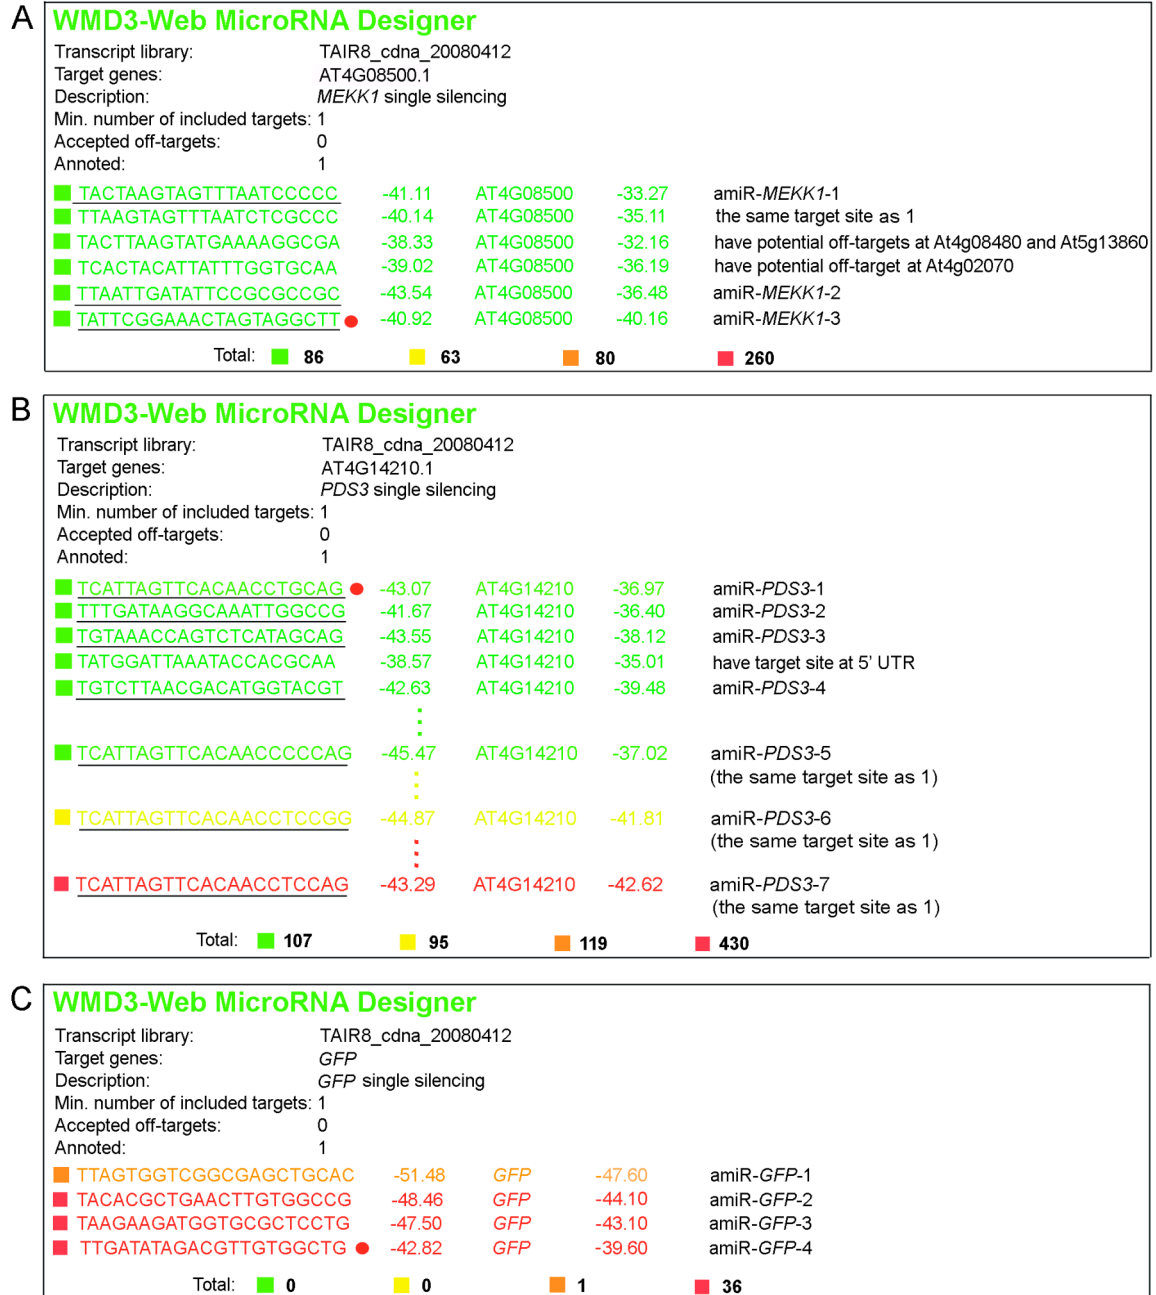

**Supplemental Figure 1.** WMD-predicted amiRNA candidates for single gene silencing. A, amiR-MEKK1s for silencing *Arabidopsis* MEKK1. B, amiR-PDS3s for silencing *Arabidopsis* PDS3. C, amiR-GFPs for silencing GFP. WMD ranks putative amiRNA candidates by sequence complementarity and hybridization energy, and colors them in green, yellow/orange and red for favorable, intermediate and unfavorable candidates, respectively. The total numbers of amiRNA candidates in individual categories are summarized at the bottom for

each target gene. Selected amiRNA candidates (with sequences underlined) for the ETPamir screen generally should have different target sites within the target gene and should have no potential off-targets. In addition, amiRNA candidates targeting the coding region are preferred over those targeting the UTRs due to easier DNA construction for epitope-tagged target protein expression. The amiRNA sequence (column 1), the hybridization energy of the amiRNA to a perfect complement (column 2), the target gene (column 3), the hybridization energy of the amiRNA to the target site within the target gene (column 4), and the name of the selected amiRNA candidate or the reason for non-selection (column 5) are shown for individual amiRNA candidates from the predicted top candidate to the last selected candidate. The most efficient amiRNA identified by the screen is labeled by a red dot.

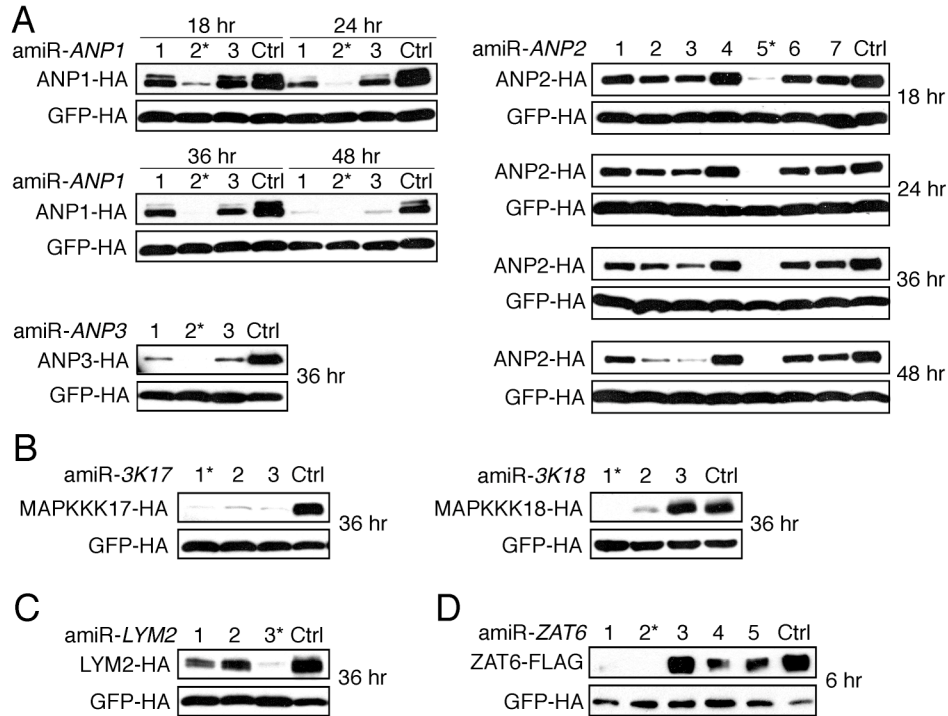

**Supplemental Figure 2.** ETPamir screens of optimal amiRNAs for other single gene silencing in *Arabidopsis*. A, ETPamir screens of optimal amiRNAs silencing individual genes, *ANP1*, *ANP2* and *ANP3*, of the *MAPKKK ANP* family. B, ETPamir screens of optimal amiRNAs silencing individual genes, *MAPKKK17* and *MAPKKK18*, of the *MAPKKK17/18* family. C, ETPamir screen of optimal amiRNA silencing *LYM2* that encodes a plasma membrane protein with unclear function. D, ETPamir screen of optimal amiRNA silencing *ZAT6* that encodes a zinc finger transcription factor. Note that the screen was conducted for only 6 hr due to the short half life (about 10 min) of *ZAT6* protein. The numerical order of each amiRNA was based on the high-to-low WMD ranking. The most efficient amiRNAs are marked by asterisks. Five independent repeats with GFP-HA as an untargeted internal control obtained similar results.

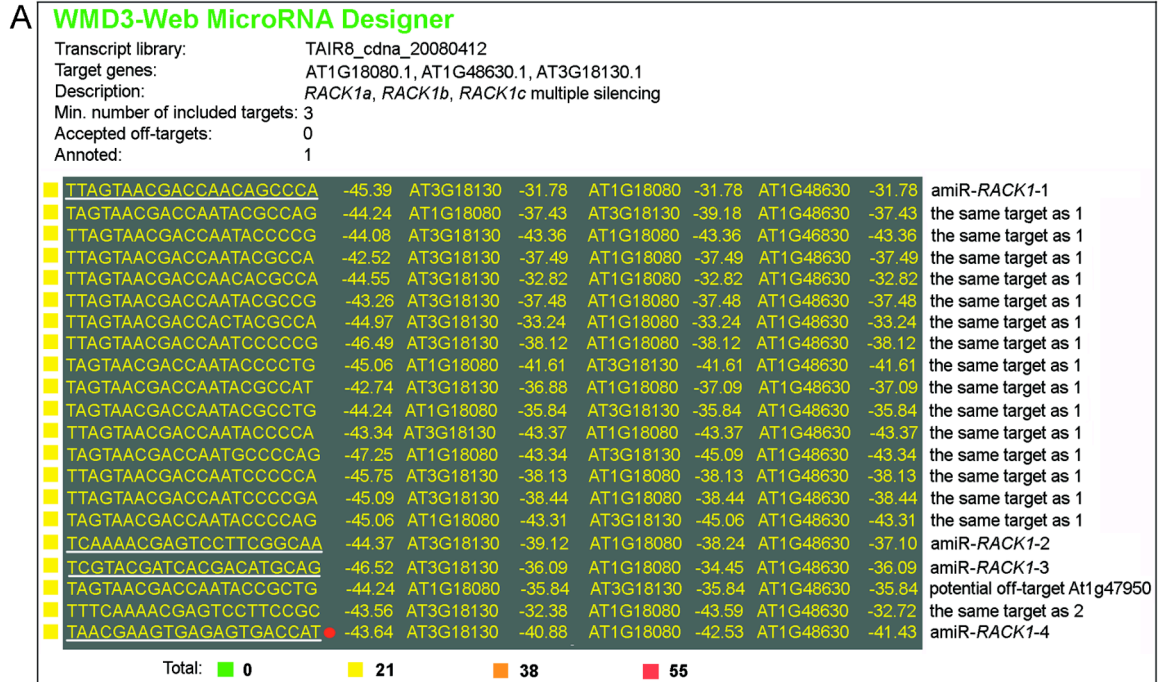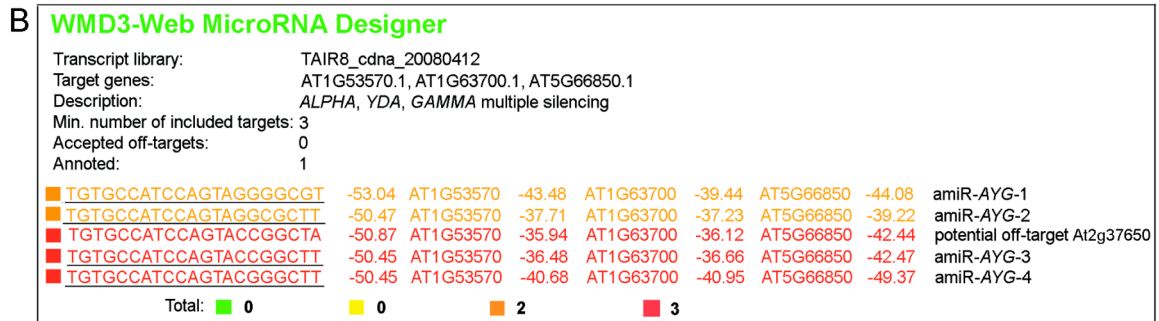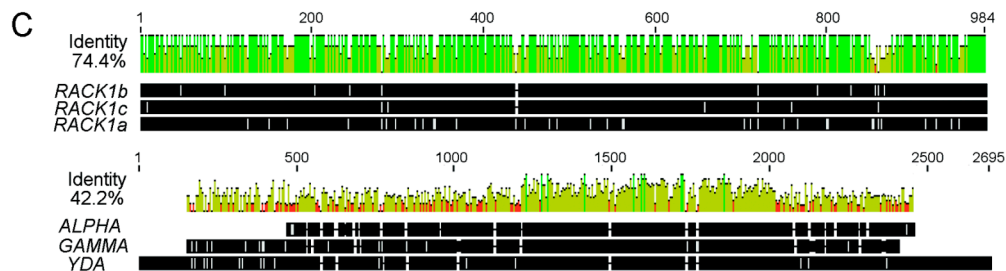

**Supplemental Figure 3.** WMD-predicted amiRNA candidates for multigene silencing. A, amiR-RACK1s for silencing the *RACK1* family. B, amiR-AYGs for silencing the *MAPKKK YDA* family. AYG stands for ALPHA, YDA and GAMMA. C, The *YDA* family members have limited sequence identity. Coding sequence alignment of the *RACK1* family (upper panel) or the *YDA* family (lower panel) was conducted by the Geneious program. Identical, similar and distinct

nucleotides are indicated in green, yellow and red, respectively. For A and B, WMD ranks putative amiRNA candidates by sequence complementarity and hybridization energy, and colors them in green, yellow/orange and red for favorable, intermediate and unfavorable candidates, respectively. The total numbers of amiRNA candidates in individual categories are summarized at the bottom for each gene family. Selected amiRNA candidates (with sequences underlined) for the screen generally should have different target sites within the target gene and should have no potential off-targets. The amiRNA sequence (column 1), the hybridization energy of the amiRNA to a perfect complement (column 2), the target gene (column 3, 5 and 7), the corresponding hybridization energy of the amiRNA to the target site within each target gene (column 4, 6 and 8), and the name of the selected amiRNA candidate or the reason for non-selection (column 9) are shown for individual amiRNA candidates from the predicted top candidate to the last selected candidate. The optimal amiRNA candidate identified by the screen is labeled by a red dot.

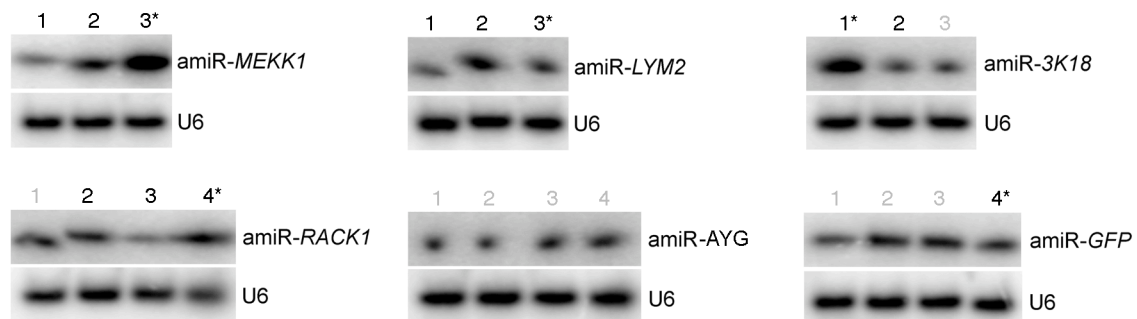

**Supplemental Figure 4.** RNA blot analysis of amiRNA expression. The amiRNAs were expressed in *Arabidopsis* mesophyll protoplasts for 6 hr and those targeting the same gene or gene family were blotted onto the same membrane. A mixture (3 or 4 as indicated) of probes were used in RNA blot for each membrane. The small noncoding RNA U6 was used for control hybridization. The optimal amiRNAs are marked by asterisks and ineffective amiRNAs are colored in gray. *3K18* stands for *MAPKKK18*, and *AYG* for ALPHA, YDA and GAMMA.

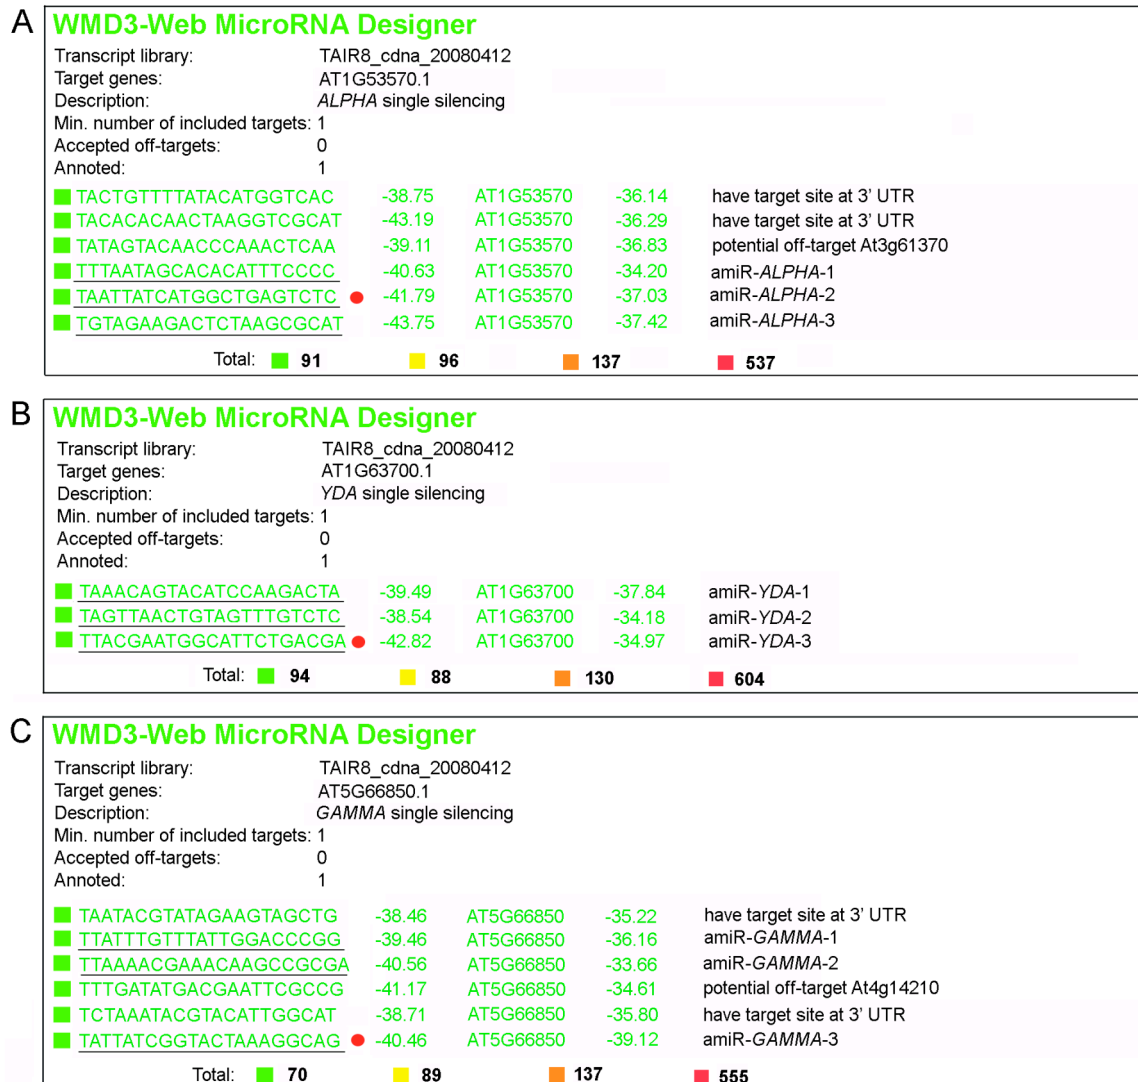

**Supplemental Figure 5.** WMD-predicted amiRNA candidates for silencing individual members of the *MAPKKK YDA* family. A, amiR-*ALPHAs* for silencing *ALPHA*. B, amiR-*YDAs* for silencing *YDA*. C, amiR-*GAMMAs* for silencing *GAMMA*. The total numbers of amiRNA candidates in individual categories are summarized at the bottom for each target gene. Selected amiRNA candidates (with sequences underlined) for the ETPamir screen generally should have different target sites within the target gene and should have no potential off-targets. In addition, amiRNA candidates targeting the coding region are preferred over those targeting the UTRs due to easier DNA construction for epitope-tagged target protein expression. The amiRNA sequence (column 1), the hybridization energy of the amiRNA to a perfect complement (column 2), the target gene



(column 3), the hybridization energy of the amiRNA to the target site within the target gene (column 4), and the name of the selected amiRNA candidate or the reason for non-selection (column 5) are shown for individual amiRNA candidates from the predicted top candidate to the last selected candidate. The most efficient amiRNA identified by the screen is labeled by a red dot.

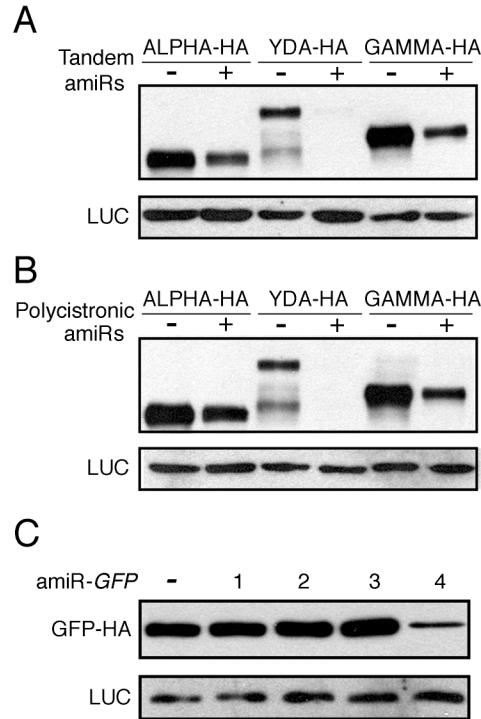

**Supplemental Figure 6.** *In planta* validation of amiRNA-mediated gene silencing by tobacco leaf agro-infiltration. A, Silencing of the *Arabidopsis* MAPKKK YDA family members (*ALPHA*, *YDA* and *GAMMA*) by tandem optimal amiRNAs. The tandem strategy expressed amiR-*YDA*-3, amiR-*GAMMA*-3 and amiR-*ALPHA*-2 in separate transcripts. B, Silencing of the *Arabidopsis* YDA family members by polycistronic optimal amiRNAs. The polycistronic strategy produced amiR-*YDA*-3, amiR-*GAMMA*-3 and amiR-*ALPHA*-2 from a single transcript. C, Silencing of *GFP* by amiR-*GFP*s. Cocktail of *Agrobacterium* cells with final OD<sub>600</sub> of 0.08 for those expressing amiRNA(s) and 0.02 for those expressing the target gene or firefly luciferase (LUC, internal control) were used for tobacco leaf infiltration. Target protein expression were examined by SDS-PAGE and immunoblot analysis at 72 hr post infiltration.



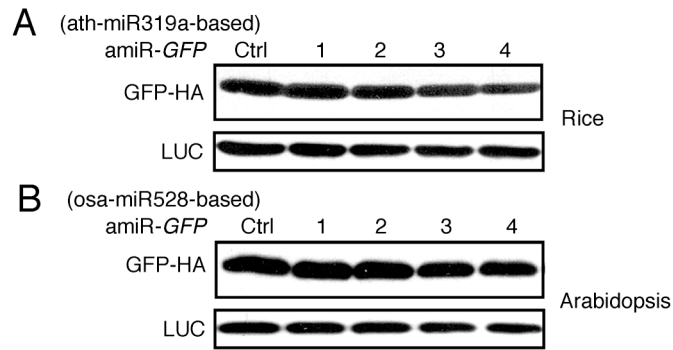

**Supplemental Figure 8.** Limited cross-species activity of *Arabidopsis* miR319a-derived amiRNA and rice miR528-derived amiRNA. A, *Arabidopsis* miR319a-derived amiR-GFP-4 has weak activity in rice protoplasts. B, Rice miR528-derived amiR-GFP-4 has weak activity in *Arabidopsis* protoplasts. Luciferase (LUC) served as a loading control. Three independent repeats were conducted for A and two for B with similar results.

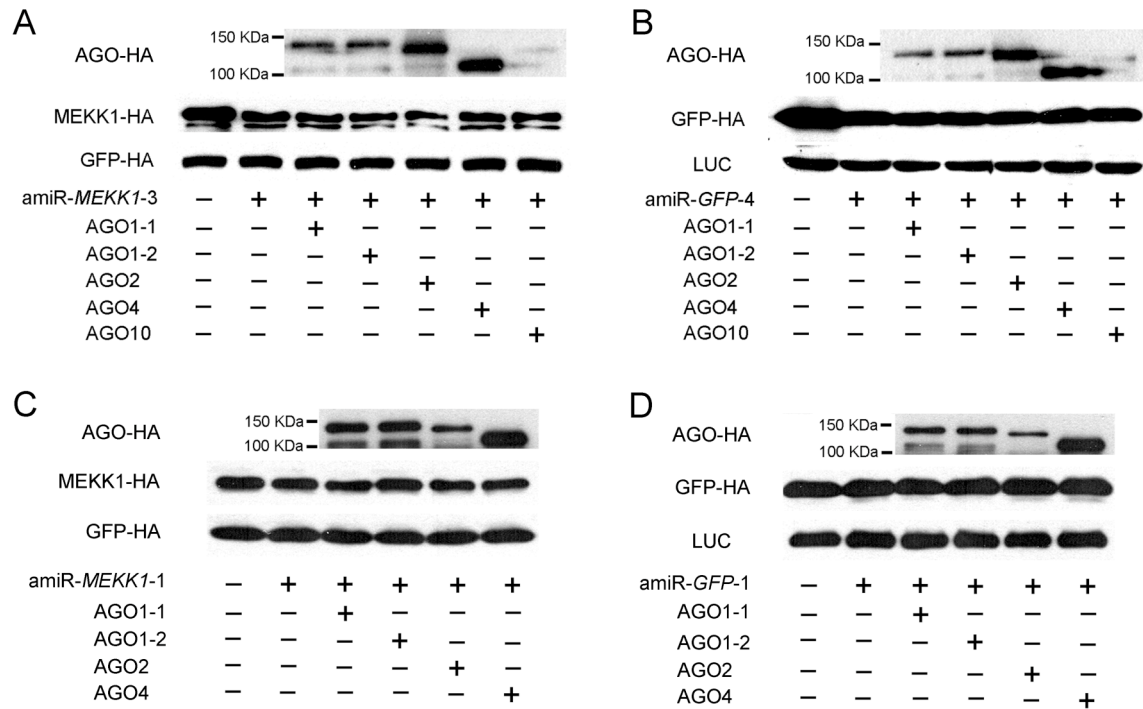

**Supplemental Figure 9.** Unlimited Argonaute activity in *Arabidopsis* mesophyll protoplasts. A, Co-expression of *Argonaute* (*AGO*) genes can not significantly enhance *MEKK1* silencing by the optimal amiR-*MEKK1-3*. B, Co-expression of *AGO* genes can not significantly enhance *GFP* silencing by the optimal amiR-*GFP-4*. C, Co-expression of *Argonaute* (*AGO*) genes can not significantly enhance *MEKK1* silencing by the suboptimal amiR-*MEKK1-1*. D, Co-expression of *AGO* genes can not significantly enhance *GFP* silencing by the inactive amiR-*GFP-1*. *AGO1-1* and *AGO1-2* are two alternatively spliced isoforms cloned from *Arabidopsis* mesophyll protoplasts. Expression of all constructs was driven by the 35S promoter for 8 hr. At this time point, obvious but not complete protein silencing was observed for optimal amiRNAs with or without *AGO* co-expression. Two independent repeats with GFP-HA or LUC as internal control were conducted with similar results.

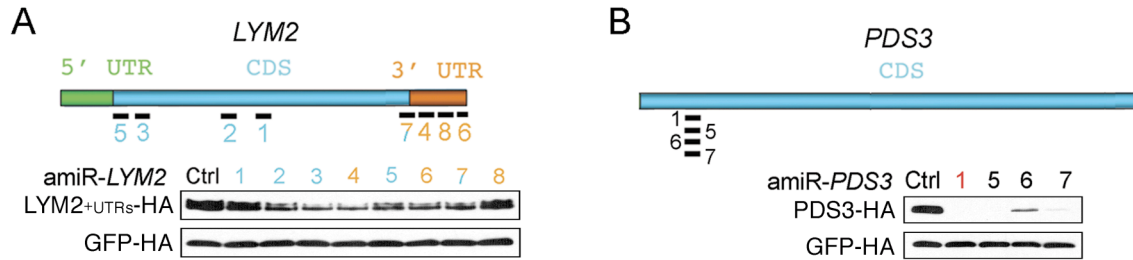

**Supplemental Figure 10.** No tight correlation between the 3' UTR targeting or WMD ranking of an amiRNA and its efficacy. A, Targeting the 3' UTR does not guarantee plant amiRNA an optimal efficacy as in the cases of animal miRNAs. To test the efficacy of UTR-targeting amiR-*LYM2*s, both 5' UTR and 3' UTR of *LYM2* were constructed into the *LYM2*-HA expression cassette. Individual amiR-*LYM2*s are colored according to the target site location. Note that the target site of amiR-*LYM2*-7 spans from the coding region to the 3' UTR. B, amiRNA candidates with low WMD ranking can have similarly high silencing efficiency. amiR-*PDS3*-5/6/7 shares the same target site with the most efficient amiR-*PDS3*-1 (red) but ranks low in the WMD output list as shown in Supplemental Figure 1B. Expression of *LYM2*<sub>+UTRs</sub> and *PDS3* was induced by 1 hr heat shock pulse after 3 hr constitutive expression of the indicated amiRNA. Heat shock inducible GFP-HA served as a loading control. All experiments were repeated four times with similar results.

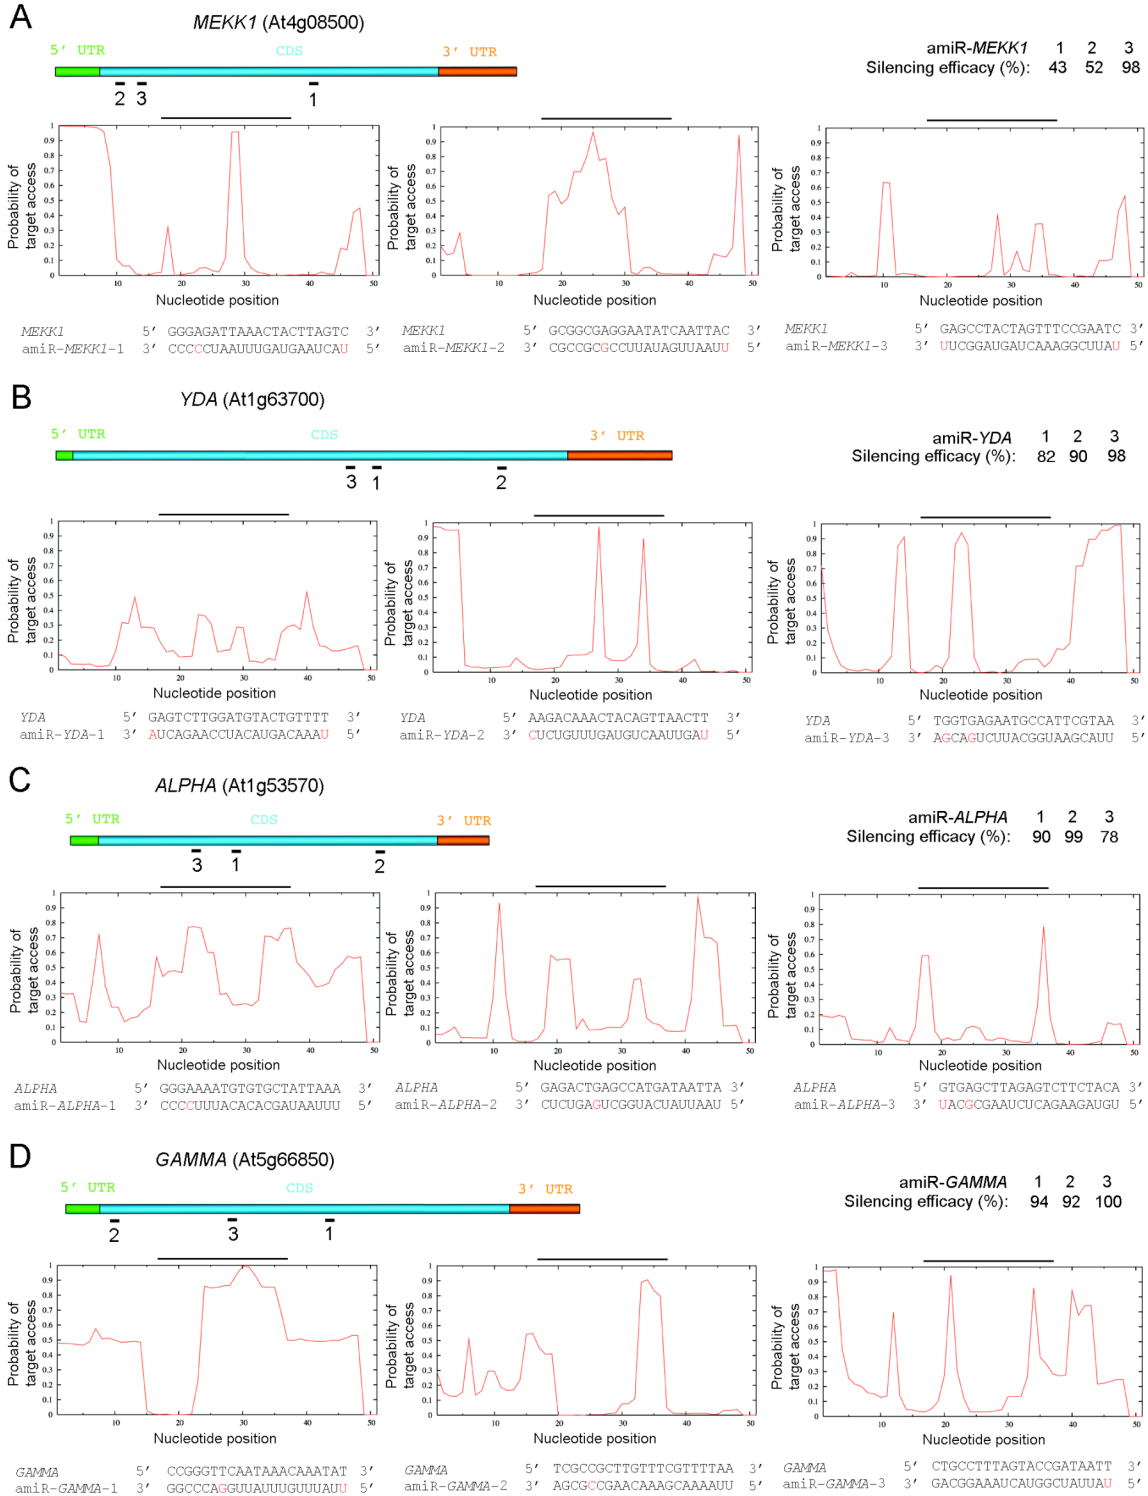

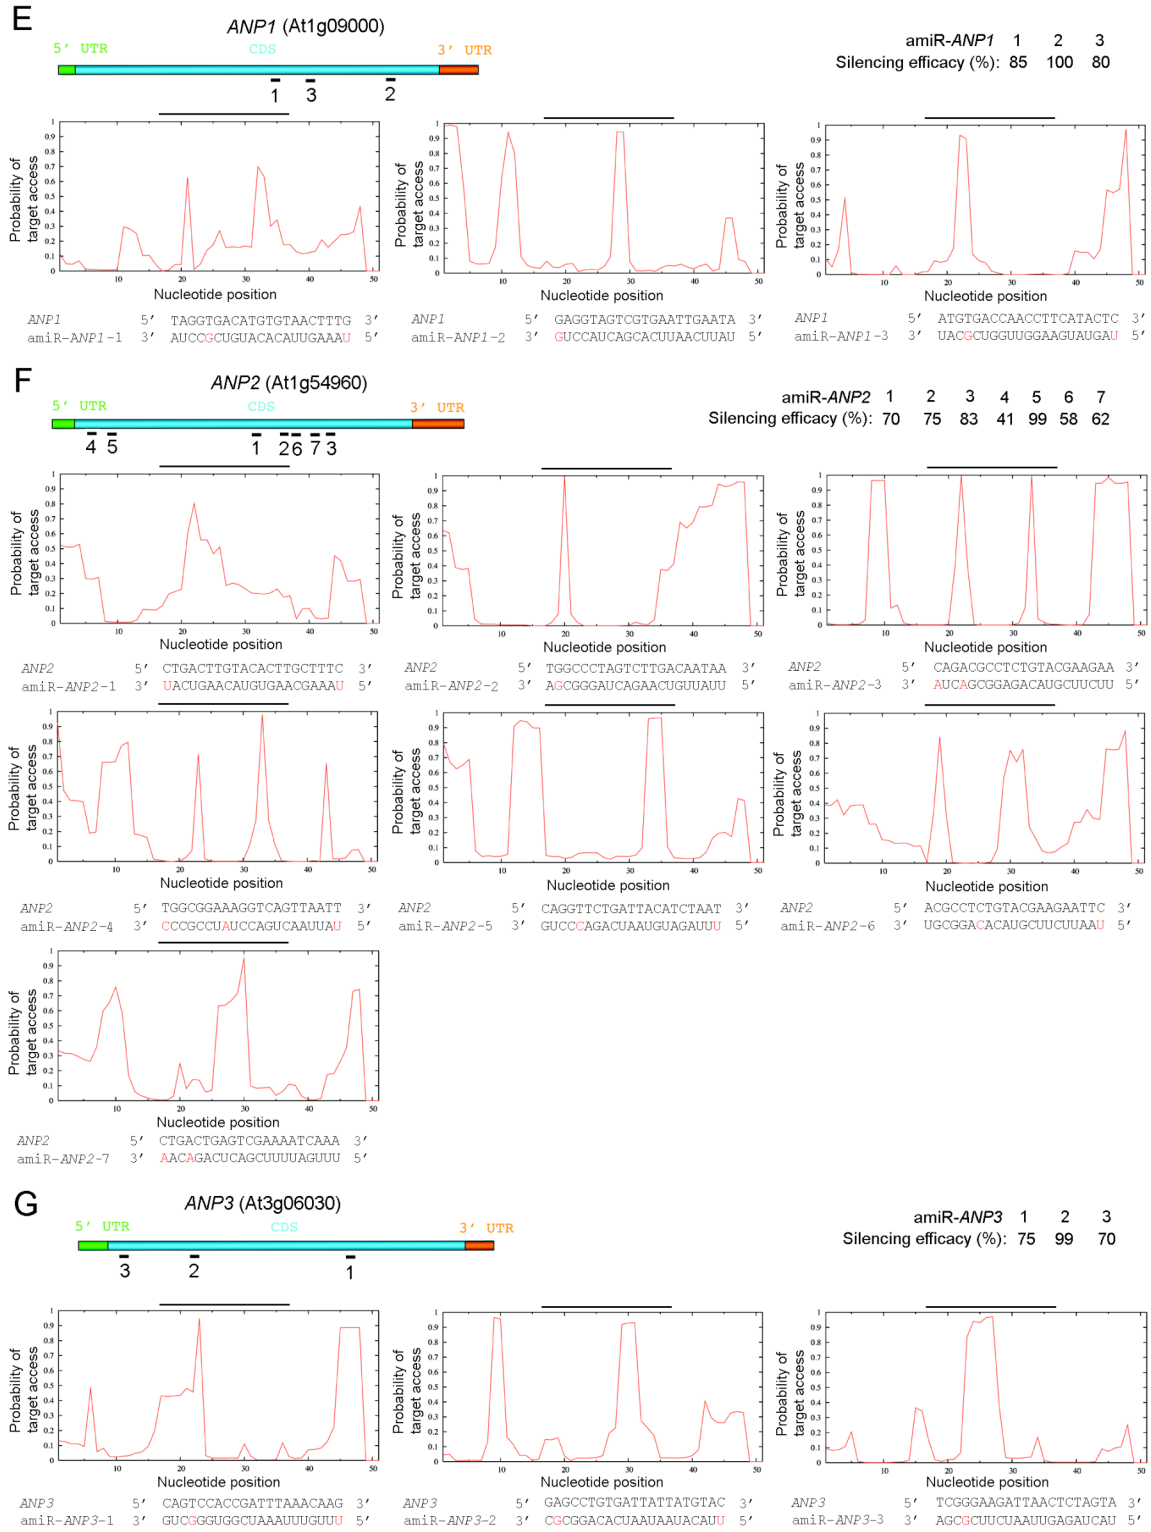



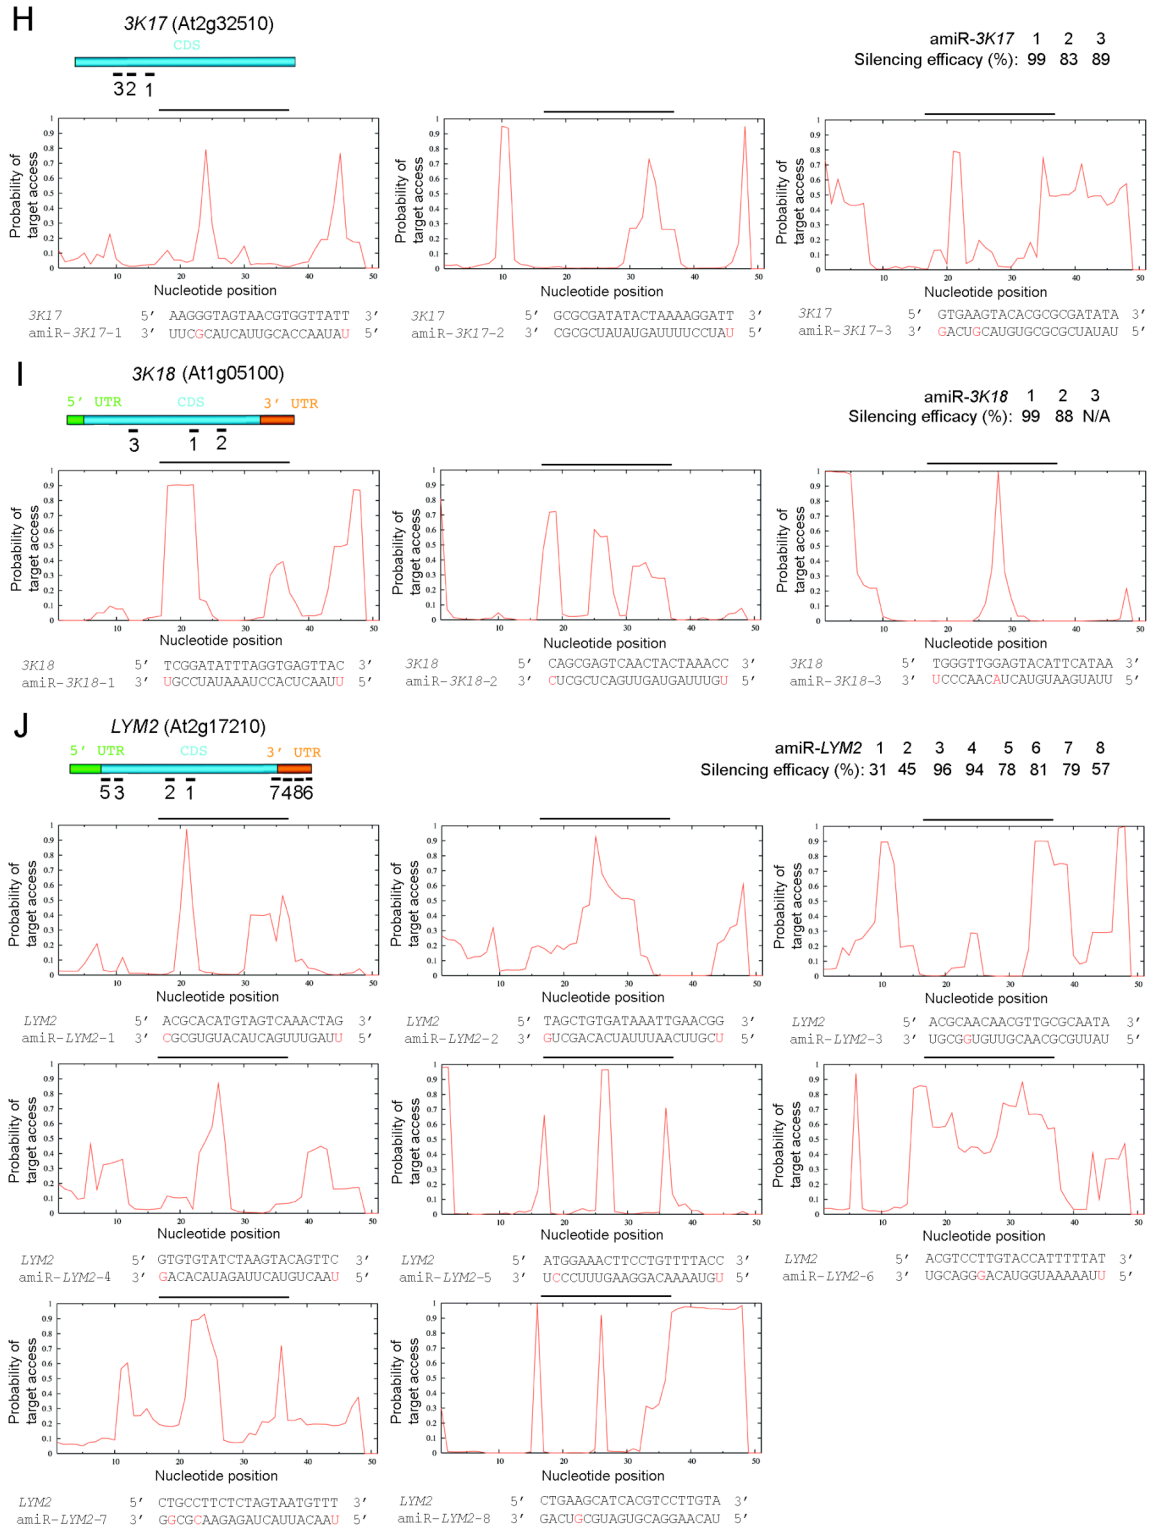

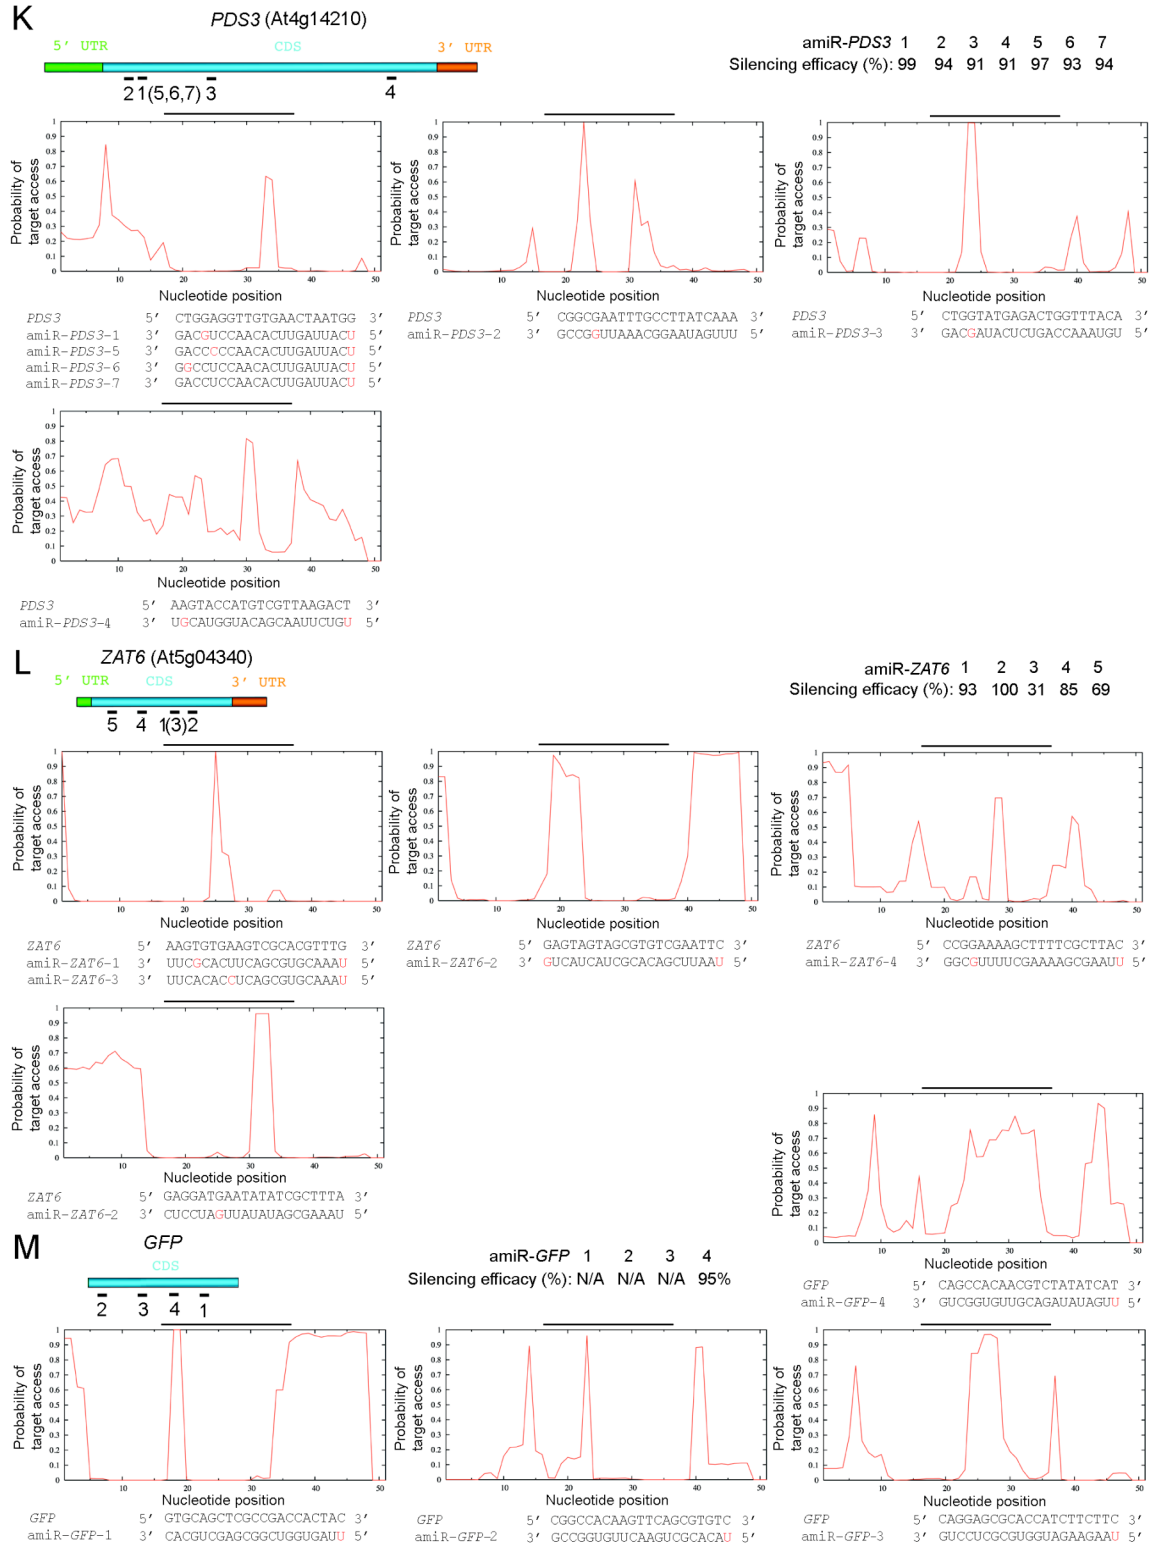

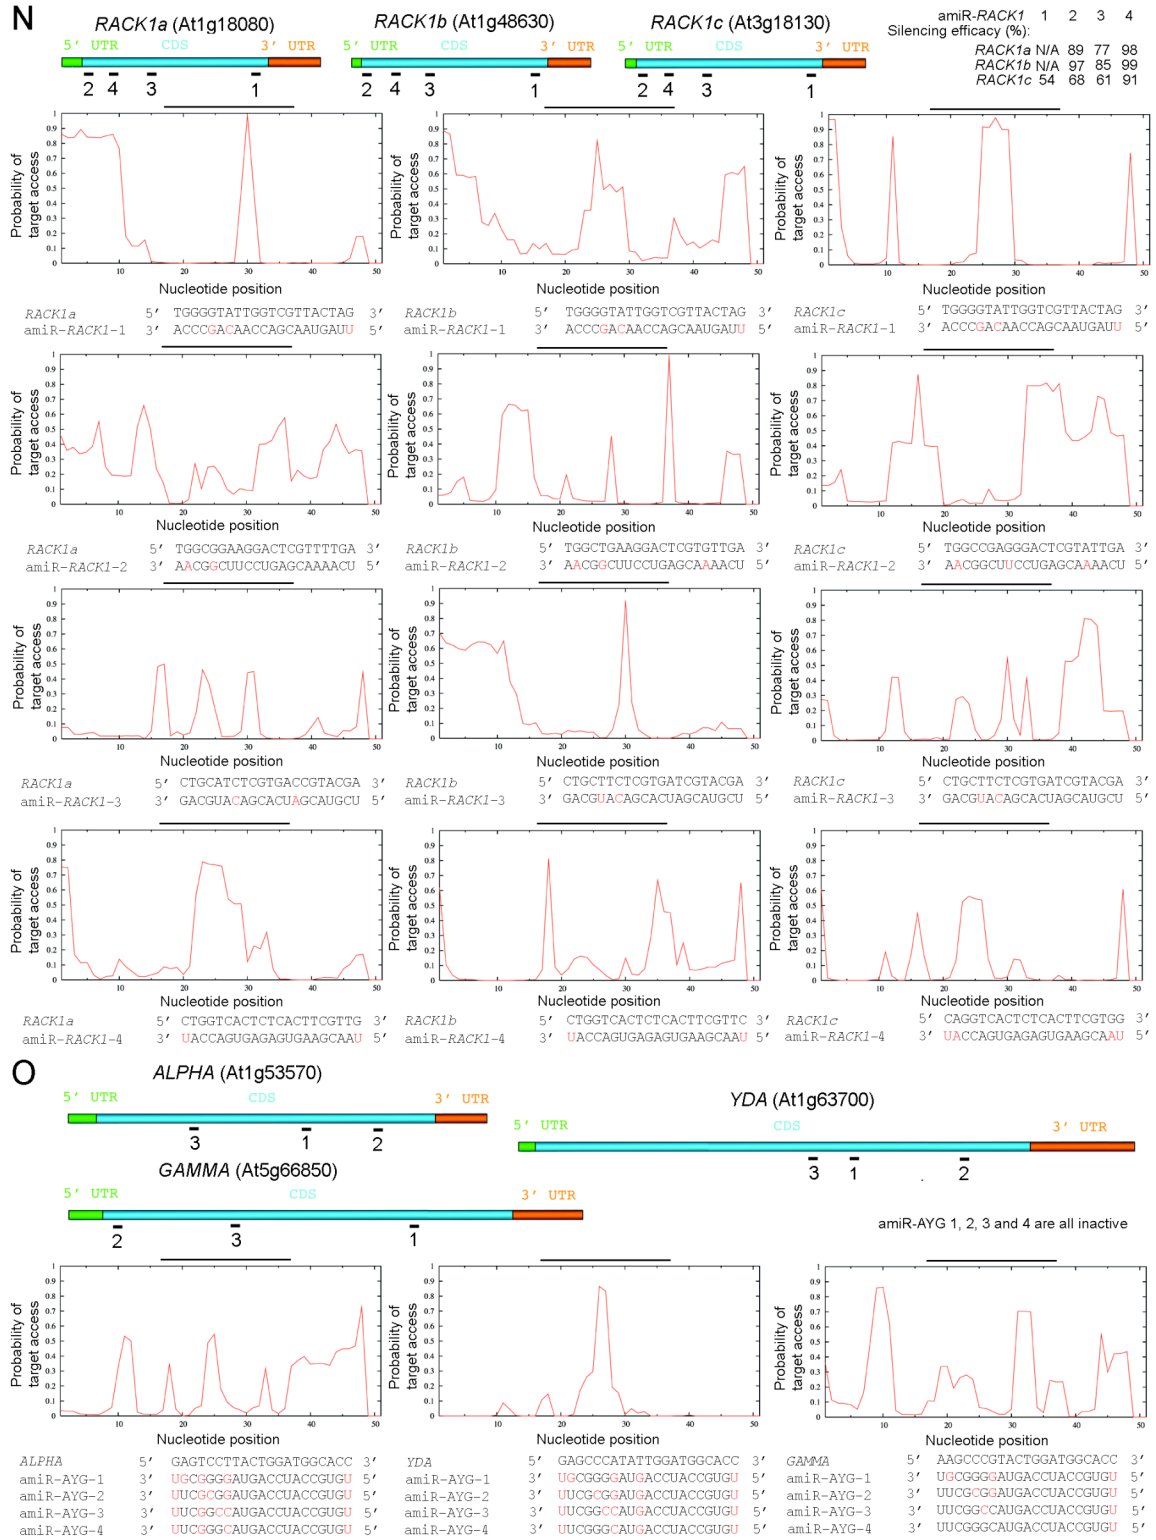

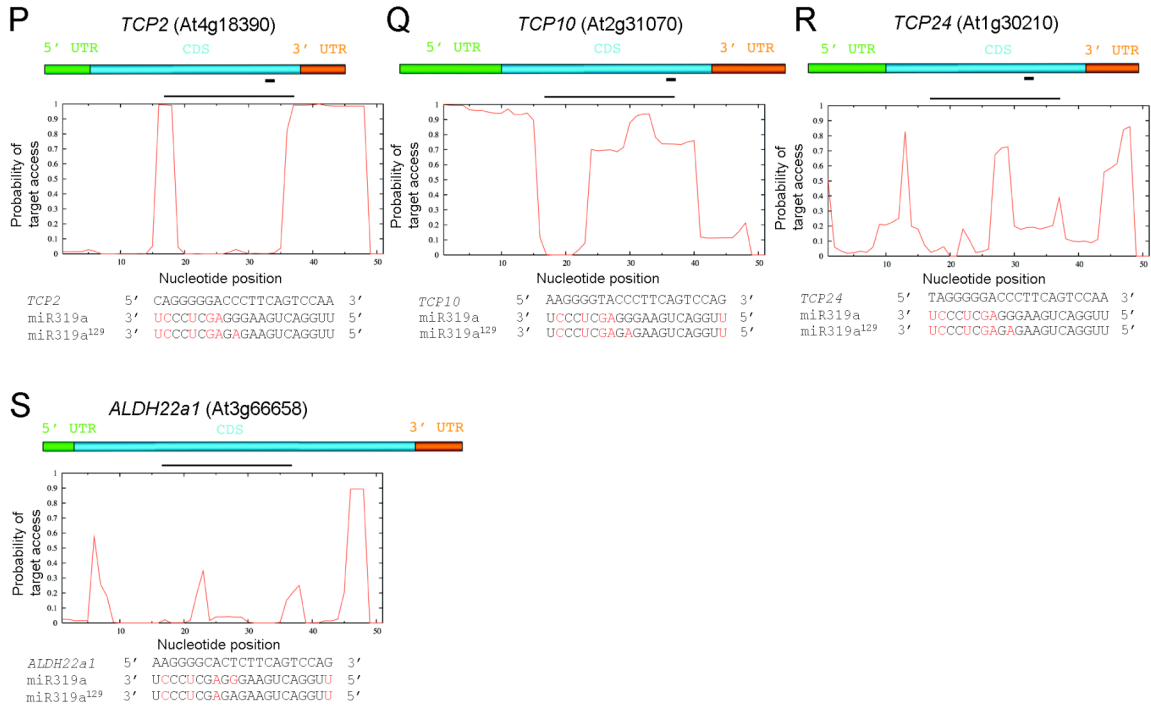

**Supplemental Figure 11.** Visual summary of amiRNA/miRNA target site location, predicted target accessibility and target complementarity. A, *MEKK1*; B, *YDA*; C, *ALPHA*; D, *GAMMA*; E, *ANP1*; F, *ANP2*; G, *ANP3*; H, *MAPKKK17* (3K17); I, *MAPKKK18* (3K18); J, *LYM2*; K, *PDS3*; L, *ZAT6*; M, *GFP*; N, the *RACK1* family; O, the *MAPKKK YDA* family; P, *TCP2*; Q, *TCP10*; R, *TCP24*; S, *ALDH22a1*. The target site accessibility was predicted by the Sfold algorithm based on a 51-nt target region (the 21-nt target sequence plus 17-nt upstream and 13-nt downstream sequences). The horizontal line on top of each target accessibility plot marks the exact position of target site in the target region. Mismatches between amiRNA/miRNA and its target sequence(s) are highlighted in red. The silencing efficiency of individual amiRNAs determined in ETPamir screens is also summarized.

**Supplemental Table 1.** Summary of amiRNAs for silencing the *MAPKKK YDA* family

| amiRNA             | Target gene | Hybridization energy (kcal/mol) | Mismatch number and position | Target site/CDS (5' to 3') | WMD prediction              | Silencing efficiency |
|--------------------|-------------|---------------------------------|------------------------------|----------------------------|-----------------------------|----------------------|
| AYG-1 <sup>a</sup> | At5g66850   | -44.08 (83.11%) <sup>b</sup>    | 3 (1, 15, 20)                | 1524-1544 /2151            | Less favorable <sup>c</sup> | ND <sup>d</sup>      |
|                    | At1g53570   | -43.48 (81.98%)                 | 5 (1, 15, 18, 20, 21)        | 1125-1145 /1827            |                             | ND                   |
|                    | At1g63700   | -39.44 (74.36%)                 | 5 (1, 12, 15, 20, 21)        | 1683-1703 /2652            |                             | ND                   |
| AYG-2              | At5g66850   | -39.22 (77.71%)                 | 3 (1, 15, 17)                | 1524-1544 /2151            | Less favorable              | ND                   |
|                    | At1g53570   | -37.71 (74.72%)                 | 5 (1, 15, 17, 18, 21)        | 1125-1145 /1827            |                             | ND                   |
|                    | At1g63700   | -37.23 (73.77%)                 | 5 (1, 12, 15, 17, 21)        | 1683-1703 /2652            |                             | ND                   |
| AYG-3              | At5g66850   | -42.47 (84.18%)                 | 2 (1, 16)                    | 1524-1544 /2151            | Unfavorable                 | ND                   |
|                    | At1g53570   | -36.48 (72.31%)                 | 5 (1, 15, 16, 18, 21)        | 1125-1145 /1827            |                             | ND                   |
|                    | At1g63700   | -36.66 (72.67%)                 | 5 (1, 12, 15, 16, 21)        | 1683-1703 /2652            |                             | ND                   |
| AYG-4              | At5g66850   | -49.37 (97.86%)                 | 1 (1)                        | 1524-1544 /2151            | Unfavorable                 | ND                   |
|                    | At1g53570   | -40.68 (80.63%)                 | 4 (1, 15, 18, 21)            | 1125-1145 /1827            |                             | ND                   |
|                    | At1g63700   | -40.95 (81.17%)                 | 4 (1, 12, 15, 21)            | 1683-1703 /2652            |                             | ND                   |

<sup>a</sup>The numerical order of each amiRNA is based on the high-to-low WMD ranking.

<sup>b</sup>The number in parentheses = hybridization energy of the amiRNA to the target site/that of the amiRNA to a perfect complement ×100%.

<sup>c</sup>WMD categorizes predicted amiRNA candidates based on sequence complementarity and hybridization energy.

<sup>d</sup>ND: No detectable gene silencing.

**Supplemental Table 2.** Predicted natural target genes for *Arabidopsis* miR319a

| Prediction server/database     | Reference                 | Predicted target genes (total gene number)                                                                                                                                            |
|--------------------------------|---------------------------|---------------------------------------------------------------------------------------------------------------------------------------------------------------------------------------|
| WMD                            | Ossowski et al., 2008     | <u><i>TCP2</i></u> , <i>TCP3*</i> , <i>TCP4*</i> , <u><i>TCP10</i></u> , <u><i>TCP24</i></u> , <b><i>MYB33</i></b> , <b><i>MYB65</i></b> , <i>MYB104</i> , <u><i>ALDH22a1</i></u> (9) |
| TAPIR                          | Bonnet et al., 2010       | <u><i>TCP2</i></u> , <i>TCP3</i> , <i>TCP4</i> , <u><i>TCP10</i></u> , <u><i>TCP24</i></u> , <b><i>MYB33</i></b> , <b><i>MYB65</i></b> , <i>MYB104</i> , <u><i>ALDH22a1</i></u> (9)   |
| UEA Plant sRNA toolkit         | Moxon et al., 2008        | <b><i>TCP4</i></b> , <u><i>TCP10</i></u> , <b><i>MYB33</i></b> , <b><i>MYB65</i></b> , <i>MYB104</i> , At5g67090 (encoding subtilase family protein) (6)                              |
| RNAhybrid                      | Alves-Junior et al., 2009 | <b><i>TCP4</i></b> , <b><i>MYB33</i></b> , <b><i>MYB65</i></b> , <i>MYB104</i> , At5g67090 (encoding subtilase family protein) (5)                                                    |
| starBase                       | Yang et al., 2011         | <u><i>TCP2</i></u> , <u><i>TCP24</i></u> , <b><i>MYB33</i></b> , <b><i>MYB65</i></b> (4)                                                                                              |
| psRNATarget                    | Dai and Zhao, 2011        | <b><i>MYB33</i></b> , <i>MYB104</i> , At5g67090 (encoding subtilase family protein) (3)                                                                                               |
| Plant microRNA database (PMRD) | Zhang et al., 2010        | <b><i>MYB33</i></b> , <b><i>MYB65</i></b> , <i>MYB104</i> (3)                                                                                                                         |

\**TCP3* and *TCP4* are predicted by WMD as miR319a target genes only if the first 20 nucleotides of miR319a are input for target search (personal communication with Rebecca Schwab)

Genes with name in bold have been previously predicted by Jones-Rhoades et al. (2004) as miR319a targets without using the above servers, and have been experimentally validated by Palatnik et al. (2003 and 2007) as natural targets. *MYB104* has also been predicted by Jones-Rhoades et al. (2004) as miR319a target without using the above servers. Genes with name underlined are investigated in this work, among which *TCP2*, *TCP10* and *TCP24* but not *ALDH22a1* are validated as natural targets of miR319a.

Target genes are all predicted using the default setting in each server/database.

**Supplemental Table 3.** Recombinant plasmids constructed during this study

| No. | Plasmid name       | Expression cassette |                        | Usage                 |
|-----|--------------------|---------------------|------------------------|-----------------------|
|     |                    | Promoter            | Gene/amiRNA            |                       |
| 1   | amiR-MEK-1         | 35S                 | amiR-MEKK1-1           | Protoplast expression |
| 2   | amiR-MEK-2         | 35S                 | amiR-MEKK1-2           | Protoplast expression |
| 3   | amiR-MEK-3         | 35S                 | amiR-MEKK1-3           | Protoplast expression |
| 4   | amiR-y-1           | 35S                 | amiR-YDA-1             | Protoplast expression |
| 5   | amiR-y-2           | 35S                 | amiR-YDA-2             | Protoplast expression |
| 6   | amiR-y-3           | 35S                 | amiR-YDA-3             | Protoplast expression |
| 7   | amiR-a-1           | 35S                 | amiR-ALPHA-1           | Protoplast expression |
| 8   | amiR-a-2           | 35S                 | amiR-ALPHA-2           | Protoplast expression |
| 9   | amiR-a-3           | 35S                 | amiR-ALPHA-3           | Protoplast expression |
| 10  | amiR-r-1           | 35S                 | amiR-GAMMA-1           | Protoplast expression |
| 11  | amiR-r-2           | 35S                 | amiR-GAMMA-2           | Protoplast expression |
| 12  | amiR-r-3           | 35S                 | amiR-GAMMA-3           | Protoplast expression |
| 13  | amiR-AP1-1         | 35S                 | amiR-ANP1-1            | Protoplast expression |
| 14  | amiR-AP1-2         | 35S                 | amiR-ANP1-2            | Protoplast expression |
| 15  | amiR-AP1-3         | 35S                 | amiR-ANP1-3            | Protoplast expression |
| 16  | amiR-AP2-1         | 35S                 | amiR-ANP2-1            | Protoplast expression |
| 17  | amiR-AP2-2         | 35S                 | amiR-ANP2-2            | Protoplast expression |
| 18  | amiR-AP2-3         | 35S                 | amiR-ANP2-3            | Protoplast expression |
| 19  | amiR-AP2-4         | 35S                 | amiR-ANP2-4            | Protoplast expression |
| 20  | amiR-AP2-5         | 35S                 | amiR-ANP2-5            | Protoplast expression |
| 21  | amiR-AP2-6         | 35S                 | amiR-ANP2-6            | Protoplast expression |
| 22  | amiR-AP2-7         | 35S                 | amiR-ANP2-7            | Protoplast expression |
| 23  | amiR-AP3-1         | 35S                 | amiR-ANP3-1            | Protoplast expression |
| 24  | amiR-AP3-2         | 35S                 | amiR-ANP3-2            | Protoplast expression |
| 25  | amiR-AP3-3         | 35S                 | amiR-ANP3-3            | Protoplast expression |
| 26  | amiR-17-1          | 35S                 | amiR-3K17-1            | Protoplast expression |
| 27  | amiR-17-2          | 35S                 | amiR-3K17-2            | Protoplast expression |
| 28  | amiR-17-3          | 35S                 | amiR-3K17-3            | Protoplast expression |
| 29  | amiR-18-1          | 35S                 | amiR-3K18-1            | Protoplast expression |
| 30  | amiR-18-2          | 35S                 | amiR-3K18-2            | Protoplast expression |
| 31  | amiR-18-3          | 35S                 | amiR-3K18-3            | Protoplast expression |
| 32  | amiR-LM2-1         | 35S                 | amiR-LYM2-1            | Protoplast expression |
| 33  | amiR-LM2-2         | 35S                 | amiR-LYM2-2            | Protoplast expression |
| 34  | amiR-LM2-3         | 35S                 | amiR-LYM2-3            | Protoplast expression |
| 35  | amiR-LM2-4         | 35S                 | amiR-LYM2-4            | Protoplast expression |
| 36  | amiR-LM2-5         | 35S                 | amiR-LYM2-5            | Protoplast expression |
| 37  | amiR-LM2-6         | 35S                 | amiR-LYM2-6            | Protoplast expression |
| 38  | amiR-LM2-7         | 35S                 | amiR-LYM2-7            | Protoplast expression |
| 39  | amiR-LM2-8         | 35S                 | amiR-LYM2-8            | Protoplast expression |
| 40  | amiR-PDS-1         | 35S                 | amiR-PDS3-1            | Protoplast expression |
| 41  | amiR-PDS-2         | 35S                 | amiR-PDS3-2            | Protoplast expression |
| 42  | amiR-PDS-3         | 35S                 | amiR-PDS3-3            | Protoplast expression |
| 43  | amiR-PDS-4         | 35S                 | amiR-PDS3-4            | Protoplast expression |
| 44  | amiR-PDS-5         | 35S                 | amiR-PDS3-5            | Protoplast expression |
| 45  | amiR-PDS-6         | 35S                 | amiR-PDS3-6            | Protoplast expression |
| 46  | amiR-PDS-7         | 35S                 | amiR-PDS3-7            | Protoplast expression |
| 47  | amiR-ZT6-1         | 35S                 | amiR-ZAT6-1            | Protoplast expression |
| 48  | amiR-ZT6-2         | 35S                 | amiR-ZAT6-2            | Protoplast expression |
| 49  | amiR-ZT6-3         | 35S                 | amiR-ZAT6-3            | Protoplast expression |
| 50  | amiR-ZT6-4         | 35S                 | amiR-ZAT6-4            | Protoplast expression |
| 51  | amiR-ZT6-5         | 35S                 | amiR-ZAT6-5            | Protoplast expression |
| 52  | amiR-GFP-1(miR319) | 35S                 | amiR-GFP-1             | Protoplast expression |
| 53  | amiR-GFP-2(miR319) | 35S                 | amiR-GFP-2             | Protoplast expression |
| 54  | amiR-GFP-3(miR319) | 35S                 | amiR-GFP-3             | Protoplast expression |
| 55  | amiR-GFP-4(miR319) | 35S                 | amiR-GFP-4             | Protoplast expression |
| 56  | amiR-RK-1          | 35S                 | amiR-RACK1-1           | Protoplast expression |
| 57  | amiR-RK-2          | 35S                 | amiR-RACK1-2           | Protoplast expression |
| 58  | amiR-RK-3          | 35S                 | amiR-RACK1-3           | Protoplast expression |
| 59  | amiR-RK-3          | 35S                 | amiR-RACK1-4           | Protoplast expression |
| 60  | amiR-AYG-1         | 35S                 | amiR-AYG-1             | Protoplast expression |
| 61  | amiR-AYG-2         | 35S                 | amiR-AYG-2             | Protoplast expression |
| 62  | amiR-AYG-3         | 35S                 | amiR-AYG-3             | Protoplast expression |
| 63  | amiR-AYG-4         | 35S                 | amiR-AYG-4             | Protoplast expression |
| 64  | miR319a-129        | 35S                 | miR319a <sup>129</sup> | Protoplast expression |
| 65  | HBT-MEKK1-HA       | 35S                 | MEKK1                  | Protoplast expression |
| 66  | HBT-YDA-HA         | 35S                 | YDA                    | Protoplast expression |
| 67  | HBT-ALPHA-HA       | 35S                 | ALPHA                  | Protoplast expression |

Supplemental Data. Li et al. (2013). Plant Cell 10.1105/tpc.113.112235

|     |                   |                            |                                            |                           |
|-----|-------------------|----------------------------|--------------------------------------------|---------------------------|
| 68  | HBT-GAMMA-HA      | 35S                        | GAMMA                                      | Protoplast expression     |
| 69  | HBT-ANP1-HA       | 35S                        | ANP1                                       | Protoplast expression     |
| 70  | HBT-ANP2-HA       | 35S                        | ANP2                                       | Protoplast expression     |
| 71  | HBT-ANP3-HA       | 35S                        | ANP3                                       | Protoplast expression     |
| 72  | HBT-17-HA         | 35S                        | MAPKKK17                                   | Protoplast expression     |
| 73  | HBT-18-HA         | 35S                        | MAPKKK18                                   | Protoplast expression     |
| 74  | HBT-LYM2-HA       | 35S                        | LYM2                                       | Protoplast expression     |
| 75  | HBT-PDS3-HA       | 35S                        | PDS3                                       | Protoplast expression     |
| 76  | HBT-ZAT6-HA       | 35S                        | ZAT6                                       | Protoplast expression     |
| 77  | HBT-GFP-HA        | 35S                        | GFP                                        | Protoplast expression     |
| 78  | HBT-RACK1a-HA     | 35S                        | RACK1a                                     | Protoplast expression     |
| 79  | HBT-RACK1b-HA     | 35S                        | RACK1b                                     | Protoplast expression     |
| 80  | HBT-RACK1c-HA     | 35S                        | RACK1c                                     | Protoplast expression     |
| 81  | HBT-AGO1-1-HA     | 35S                        | AGO1-1                                     | Protoplast expression     |
| 82  | HBT-AGO1-2-HA     | 35S                        | AGO1-2                                     | Protoplast expression     |
| 83  | HBT-AGO2-HA       | 35S                        | AGO2                                       | Protoplast expression     |
| 84  | HBT-AGO4-HA       | 35S                        | AGO4                                       | Protoplast expression     |
| 85  | HBT-AGO10-HA      | 35S                        | AGO10                                      | Protoplast expression     |
| 86  | HSP-MEKK1-HA      | Heat shock                 | MEKK1                                      | Protoplast expression     |
| 87  | HSP-YDA-HA        | Heat shock                 | YDA                                        | Protoplast expression     |
| 88  | HSP-ALPHA-HA      | Heat shock                 | ALPHA                                      | Protoplast expression     |
| 89  | HSP-GAMMA-HA      | Heat shock                 | GAMMA                                      | Protoplast expression     |
| 90  | HSP-ANP1-HA       | Heat shock                 | ANP1                                       | Protoplast expression     |
| 91  | HSP-ANP2-HA       | Heat shock                 | ANP2                                       | Protoplast expression     |
| 92  | HSP-ANP3-HA       | Heat shock                 | ANP3                                       | Protoplast expression     |
| 93  | HSP-17-HA         | Heat shock                 | MAPKKK17                                   | Protoplast expression     |
| 94  | HSP-18-HA         | Heat shock                 | MAPKKK18                                   | Protoplast expression     |
| 95  | HSP-LYM2-HA       | Heat shock                 | LYM2                                       | Protoplast expression     |
| 96  | HSP-LYM2UTR-HA    | Heat shock                 | LYM2 with 5' UTR & 3' UTR                  | Protoplast expression     |
| 97  | HSP-PDS3-HA       | Heat shock                 | PDS3                                       | Protoplast expression     |
| 98  | HSP-GFP-HA        | Heat shock                 | GFP                                        | Protoplast expression     |
| 99  | HSP-RACK1a-HA     | Heat shock                 | RACK1a                                     | Protoplast expression     |
| 100 | HSP-RACK1b-HA     | Heat shock                 | RACK1b                                     | Protoplast expression     |
| 101 | HSP-RACK1c-HA     | Heat shock                 | RACK1c                                     | Protoplast expression     |
| 102 | HSP-TCP2-HA       | Heat shock                 | TCP2                                       | Protoplast expression     |
| 103 | HSP-TCP10-HA      | Heat shock                 | TCP10                                      | Protoplast expression     |
| 104 | HSP-TCP24-HA      | Heat shock                 | TCP24                                      | Protoplast expression     |
| 105 | HSP-TCP20-HA      | Heat shock                 | TCP20                                      | Protoplast expression     |
| 106 | HSP-ALDH22a1-HA   | Heat shock                 | ALDH22a1                                   | Protoplast expression     |
| 107 | 3SUMO-Target-y-HA | 35S                        | 3XSUMOAA-TargetamiR-YDA-3                  | Protoplast expression     |
| 108 | 2SUMO-Target-r-HA | 35S                        | 2XSUMOAA-TargetamiR-GAMMA-3                | Protoplast expression     |
| 109 | SUMO-Target-a-HA  | 35S                        | SUMOAA-TargetamiR-ALPHA-3                  | Protoplast expression     |
| 110 | amiR-Poly-AYG     | 35S                        | amiR-YDA-3, amiR-GAMMA-3, amiR-ALPHA-2     | Protoplast expression     |
| 111 | amiR-Tandem-AYG   | 35S<br>35S<br>35S          | amiR-YDA-3<br>amiR-GAMMA-3<br>amiR-ALPHA-2 | Protoplast expression     |
| 112 | pFGC-amiR-Poly    | 35S                        | amiR-YDA-3, amiR-GAMMA-3, amiR-ALPHA-2     | Tobacco leaf infiltration |
| 113 | pFGC-amiR-Tandem  | 35S<br>35S<br>35S          | amiR-YDA-3<br>amiR-GAMMA-3<br>amiR-ALPHA-2 | Tobacco leaf infiltration |
| 114 | pFGC-YDA-HA       | 35S                        | YDA                                        | Tobacco leaf infiltration |
| 115 | pFGC-ALPHA-HA     | 35S                        | ALPHA                                      | Tobacco leaf infiltration |
| 116 | pFGC-GAMMA-HA     | 35S                        | GAMMA                                      | Tobacco leaf infiltration |
| 117 | pCB302-GFP-HA     | 35S                        | GFP                                        | Tobacco leaf infiltration |
| 118 | pCB302-LUC        | 35S                        | Firefly Luciferase                         | Tobacco leaf infiltration |
| 119 | pCB302-amiR-GFP-1 | 35S                        | amiR-GFP-1                                 | Tobacco leaf infiltration |
| 120 | pCB302-amiR-GFP-2 | 35S                        | amiR-GFP-2                                 | Tobacco leaf infiltration |
| 121 | pCB302-amiR-GFP-3 | 35S                        | amiR-GFP-3                                 | Tobacco leaf infiltration |
| 122 | pCB302-amiR-GFP-4 | 35S                        | amiR-GFP-4                                 | Tobacco leaf infiltration |
| 123 | pCB302-amiR-MEK-1 | 35S                        | amiR-MEKK1-1                               | Transgenic expression     |
| 124 | pCB302-amiR-MEK-3 | 35S                        | amiR-MEKK1-3                               | Transgenic expression     |
| 125 | pCB302-amiR-PDS-1 | 35S                        | amiR-PDS3-1                                | Transgenic expression     |
| 126 | pCB302-amiR-PDS-4 | 35S                        | amiR-PDS3-4                                | Transgenic expression     |
| 127 | pCB302-amiR-RK-1  | 35S                        | amiR-RACK1-1                               | Transgenic expression     |
| 128 | pCB302-amiR-RK-4  | 35S                        | amiR-RACK1-4                               | Transgenic expression     |
| 129 | pFGC-amiR-MEKK1   | 35S<br>Estradiol-inducible | GFP-TargetamiR-MEKK1-3<br>amiR-MEKK1-3     | Transgenic expression     |



Supplemental Data. Li et al. (2013). Plant Cell 10.1105/tpc.113.112235

|     |                    |     |                     |                       |
|-----|--------------------|-----|---------------------|-----------------------|
| 130 | amiR-GFP-1(miR528) | 35S | amiR- <i>GFP</i> -1 | Protoplast expression |
| 131 | amiR-GFP-2(miR528) | 35S | amiR- <i>GFP</i> -2 | Protoplast expression |
| 132 | amiR-GFP-3(miR528) | 35S | amiR- <i>GFP</i> -3 | Protoplast expression |
| 133 | amiR-GFP-4(miR528) | 35S | amiR- <i>GFP</i> -4 | Protoplast expression |

---

**Supplemental Table 4. Primers used for qPCR in this study**

| Gene             | Primer name              | Sequence (5' to 3')       | Amplicon position                                   |
|------------------|--------------------------|---------------------------|-----------------------------------------------------|
| <i>MEKK1</i>     | MEKK1-qPCR-5-F           | ACTGGACGAAGAGGAGGAGA      | Upstream of the amiR- <i>MEKK1</i> -3 target site   |
|                  | MEKK1-qPCR-5-R           | TCAACGAAGAAGTCGAAACG      |                                                     |
|                  | MEKK1-qPCR-c-F           | TACGACGCAGCTTCATGTTC      | Spanning the amiR- <i>MEKK1</i> -3 target site      |
|                  | MEKK1-qPCR-c-R           | AGCCAAATCATCAGGACCAG      |                                                     |
| <i>MEKK1</i>     | MEKK1-qPCR-3-F           | CCGAAAGGATAGTGATGGCTATGG  | Downstream of the amiR- <i>MEKK1</i> -3 target site |
|                  | MEKK1-qPCR-3-R           | GATCCTAAACAGGGCTTGAACGG   |                                                     |
| <i>YDA</i>       | YDA-qPCR-5-F             | TGAAAGTGGGGAGATGTGTG      | Upstream of the amiR- <i>YDA</i> -3 target site     |
|                  | YDA-qPCR-5-R             | CGAACCACCGGAGACATACT      |                                                     |
|                  | YDA-qPCR-c-F             | AGTATGTCTCCGGTGGTTCG      | Spanning the amiR- <i>YDA</i> -3 target site        |
|                  | YDA-qPCR-c-R             | CCATCCCAAAATCAGCAACT      |                                                     |
|                  | YDA-qPCR-3-F             | GAGCACCATGAGATCACTGGAC    | Downstream of the amiR- <i>YDA</i> -3 target site   |
| YDA-qPCR-3-R     | TCCGAGTCTAAGCACGGAAGAC   |                           |                                                     |
| <i>ALPHA</i>     | ALPHA-qPCR-5-F           | TGGGATGGCCAAACATGTAACAG   | Upstream of the amiR- <i>ALPHA</i> -2 target site   |
|                  | ALPHA-qPCR-5-F           | GATATCGACTGCATGAGTGTAGCC  |                                                     |
|                  | ALPHA-qPCR-c-F           | TCACTGCCTACAAGGGAACC      | Spanning the amiR- <i>ALPHA</i> -2 target site      |
|                  | ALPHA-qPCR-c-F           | GGTGAGGAGGTGACAGGAAA      |                                                     |
| <i>ALPHA</i>     | ALPHA-qPCR-3-F           | TAAAGAGCCCGAGCAGAGAA      | Downstream of the amiR- <i>ALPHA</i> -2 target site |
|                  | ALPHA-qPCR-3-F           | CACTGTCTTGCCAGGAAAT       |                                                     |
| <i>GAMMA</i>     | GAMMA-qPCR-5-F           | CTTCCGCAAATCTCGTTCTC      | Upstream of the amiR- <i>GAMMA</i> -3 target site   |
|                  | GAMMA-qPCR-5-F           | CCGATCCCGATCCTGATTAC      |                                                     |
|                  | GAMMA-qPCR-c-F           | TGCTCCAGATATGCCACTTG      | Spanning the amiR- <i>GAMMA</i> -3 target site      |
|                  | GAMMA-qPCR-c-F           | AACGGTGAAGATGGTCTGCT      |                                                     |
|                  | GAMMA-qPCR-3-F           | AGCGACCAACCGCATCTATGTTG   | Downstream of the amiR- <i>GAMMA</i> -3 target site |
| GAMMA-qPCR-3-F   | TCCCTTCTACTGCTTGGTTCCG   |                           |                                                     |
| <i>ANP1</i>      | ANP1-qPCR-5-F            | AGCTGAGTTGGCTACGATGACTGGT | Upstream of the amiR- <i>ANP1</i> -2 target site    |
|                  | ANP1-qPCR-5-F            | CCGACGCTCCATATGTCAGCAGAG  |                                                     |
|                  | ANP1-qPCR-c-F            | AGAGGACACTGCTCGTGGTT      | Spanning the amiR- <i>ANP1</i> -2 target site       |
|                  | ANP1-qPCR-c-F            | CGTGCTGATACACCATCCTG      |                                                     |
| <i>ANP1</i>      | ANP1-qPCR-3-F            | GGGGTCTCGTTGTTGACACT      | Downstream of the amiR- <i>ANP1</i> -2 target site  |
|                  | ANP1-qPCR-3-F            | CCTGTGCTCTTGGGGATGA       |                                                     |
| <i>ANP2</i>      | ANP2-qPCR-5-F            | AATCCCAGTCACCCTCCGAAT     | Upstream of the amiR- <i>ANP2</i> -5 target site    |
|                  | ANP2-qPCR-5-F            | GAACCTGTTTAAACGGCGAGA     |                                                     |
|                  | ANP2-qPCR-c-F            | TCTCGCCGTTAAACAGGTTTC     | Spanning the amiR- <i>ANP2</i> -5 target site       |
|                  | ANP2-qPCR-c-F            | TCATCTTCCCTCACCGTACC      |                                                     |
|                  | ANP2-qPCR-3-F            | AGCAATGCAAGTGTGCTGTGCTG   | Downstream of the amiR- <i>ANP2</i> -5 target site  |
| ANP2-qPCR-3-F    | TCCCTGCTTGCCGTGTAATCTCTC |                           |                                                     |
| <i>ANP3</i>      | ANP3-qPCR-5-F            | GGTGGAGGAAAGGGGAATTA      | Upstream of the amiR- <i>ANP3</i> -2 target site    |
|                  | ANP3-qPCR-5-F            | TTCTCAAGCTCTCGGATGT       |                                                     |
|                  | ANP3-qPCR-c-F            | TCTTTCACATCCGAACATCG      | Spanning the amiR- <i>ANP3</i> -2 target site       |
|                  | ANP3-qPCR-c-F            | GATGCATGATCCCATTTGTTG     |                                                     |
|                  | ANP3-qPCR-3-F            | AGAGCTTGAGAGGCATCGAGAG    | Downstream of the amiR- <i>ANP3</i> -2 target site  |
| ANP3-qPCR-3-F    | AATGGAGTCTTCCCTCCTGCAC   |                           |                                                     |
| <i>MAP KKK17</i> | 3K17-qPCR-5-F            | GTATGGAACGTTGACCGATGCG    | Upstream of the amiR- <i>3K17</i> -1 target site    |
|                  | 3K17-qPCR-5-F            | ATCGCGCGTGTACTTCACTACC    |                                                     |
|                  | 3K17-qPCR-c-F            | CTCGAAAGGAATCGTGCATT      | Spanning the amiR- <i>3K17</i> -1 target site       |
|                  | 3K17-qPCR-c-F            | CCACCTCTGGAGCCATAAAA      |                                                     |
| <i>MAP KKK17</i> | 3K17-qPCR-3-F            | GTGTGTTGGTGGTTTGGATGGG    | Downstream of the amiR- <i>3K17</i> -1 target site  |
|                  | 3K17-qPCR-3-F            | TTCTTACACCTCGCTCTCAC      |                                                     |
| <i>MAP KKK18</i> | 3K18-qPCR-5-F            | AAGCAACGTGTTGGTCGGAGAG    | Upstream of the amiR- <i>3K18</i> -1 target site    |
|                  | 3K18-qPCR-5-F            | CGGTTCAACCCATTTCGCACAC    |                                                     |
|                  | 3K18-qPCR-c-F            | GAGATGGTTACCGGTCTCA       | Spanning the amiR- <i>3K18</i> -1 target site       |
|                  | 3K18-qPCR-c-F            | CATCTCTCCGTCGCTTCTTT      |                                                     |
|                  | 3K18-qPCR-3-F            | TCAAGCTGGTGGGAATGTCACG    | Downstream of the amiR- <i>3K18</i> -1 target site  |
| 3K18-qPCR-3-F    | TGGACTCCACCACAACATGACC   |                           |                                                     |
| <i>LYM2</i>      | LYM2-qPCR-5-F            | CGTTCAGACTATGCTTACCC*     | Upstream of the amiR- <i>LYM2</i> -3 target site    |
|                  | LYM2-qPCR-5-F            | TGCTTGAGTAACCAACGAGAG     |                                                     |
|                  | LYM2-qPCR-c-F            | TCAAGCAAGAACGCAACAAC      | Spanning the amiR- <i>LYM2</i> -3 target site       |
|                  | LYM2-qPCR-c-F            | AGAGCAATGGATTGGGACAC      |                                                     |
| <i>LYM2</i>      | LYM2-qPCR-3-F            | GCGTCTATGCTGGTTACTCCAACC  | Downstream of the amiR- <i>LYM2</i> -3 target site  |
|                  | LYM2-qPCR-3-F            | TCAGGACCAGCAGAATCTGGAC    |                                                     |
| <i>PDS3</i>      | PDS3-qPCR-5-F            | TGGTTGTGTTTGGGAATGTT      | Upstream of the amiR- <i>PDS3</i> -1 target site    |
|                  | PDS3-qPCR-5-F            | CAGATGAAAGTGCCTCCAAA      |                                                     |
|                  | PDS3-qPCR-c-F            | GGTTTTGGAGGCACCTTCA       | Spanning the amiR- <i>PDS3</i> -1 target site       |
|                  | PDS3-qPCR-c-F            | TCTTAGCTCTGGCCTTGGGA      |                                                     |
|                  | PDS3-qPCR-3-F            | ATTTGCACCAGCAGAGGAAT      | Downstream of the amiR- <i>PDS3</i> -1 target site  |
| PDS3-qPCR-3-F    | CGACATGGTTCACAGTTGG      |                           |                                                     |

Supplemental Data. Li et al. (2013). Plant Cell 10.1105/tpc.113.112235

|            |              |                         |                                                  |
|------------|--------------|-------------------------|--------------------------------------------------|
| <i>GFP</i> | GFP-qPCR-5-F | AGGAGCGCACCATCTTCTT     | Downstream of the amiR- <i>GFP-4</i> target site |
|            | GFP-qPCR-5-F | TGTAGTTGTACTCCAGCTTGTGC |                                                  |
|            | GFP-qPCR-c-F | ACGACGGCAACTACAAGACC    | Upstream of the amiR- <i>GFP-4</i> target site   |
|            | GFP-qPCR-c-F | ACCTTGATGCCGTTCTTCTG    |                                                  |
|            | GFP-qPCR-3-F | TATATCATGGCCGACAAGCA    | Spanning the amiR- <i>GFP-4</i> target site      |
|            | GFP-qPCR-3-F | ACTGGGTGCTCAGGTAGTGG    |                                                  |

\*LYM2-qPCR-5-F was designed based on the HA tag coding sequence, which was inserted behind the coding sequence of the signal peptide of LYM2 (amino acids 1-23) and was located upstream of the amiR-*LYM2-3* target site within *LYM2*.

**Supplemental Table 5.** Sequences of amiRNA/miRNAs tested during this study

| No. | amiRNA name            | Target gene                   | amiRNA sequence (5' to 3') |
|-----|------------------------|-------------------------------|----------------------------|
| 1   | MEKK1-1                | At4g08500                     | UACUAAGUAGUUUAAUCCCCC      |
| 2   | MEKK1-2                | At4g08500                     | UUAAUUGAUUUCGCGCCGC        |
| 3   | MEKK1-3                | At4g08500                     | UAUUCGGAACUAGUAGGCUU       |
| 4   | YDA-1                  | At1g63700                     | UAAACAGUACAUCCAAGACUA      |
| 5   | YDA-2                  | At1g63700                     | UAGUUAACUGUAGUUUGUCUC      |
| 6   | YDA-3                  | At1g63700                     | UUACGAAUGGCAUUCUGACGA      |
| 7   | ALPHA-1                | At1g53570                     | UUUAAUAGCACACAUUUCCCC      |
| 8   | ALPHA-2                | At1g53570                     | UAAUUUAUCAUGGCUGAGUCUC     |
| 9   | ALPHA-3                | At1g53570                     | UGUAGAAGACUCUAAGCGCAU      |
| 10  | GAMMA-1                | At5g66850                     | UUUUUUUUUUUUUUGGACCCGG     |
| 11  | GAMMA-2                | At5g66850                     | UUAAAACGAAACAAGCCGCGA      |
| 12  | GAMMA-3                | At5g66850                     | UAUUUUCGGUACUAAAGGCAG      |
| 13  | ANP1-1                 | At1g09000                     | UAAAGUUACACAUUGUCGCCUA     |
| 14  | ANP1-2                 | At1g09000                     | UAUUCAAUUCACGACUACCUG      |
| 15  | ANP1-3                 | At1g09000                     | UAGUAUGAAGGUUGGUCGCAU      |
| 16  | ANP2-1                 | At1g54960                     | UAAAGCAAGUGUACAAGUCAU      |
| 17  | ANP2-2                 | At1g54960                     | UUUUUUGUCAAGACUAGGGCGA     |
| 18  | ANP2-3                 | At1g54960                     | UUCUUCGUACAGAGGGCGACUA     |
| 19  | ANP2-4                 | At1g54960                     | UAUUAAACUGACCUAUGCCGCC     |
| 20  | ANP2-5                 | At1g54960                     | UUUAGAUGUAAUCAGACCCUG      |
| 21  | ANP2-6                 | At1g54960                     | UAAUUCUUCGUACACAGGCGU      |
| 22  | ANP2-7                 | At1g54960                     | UUUGAUUUUCGACUCAGACAA      |
| 23  | ANP3-1                 | At3g06030                     | UUUGUUUUAAAUCGGUGGGCUG     |
| 24  | ANP3-2                 | At3g06030                     | UUACAUAUAAUUCACGCGCGC      |
| 25  | ANP3-3                 | At3g06030                     | UACUAGAGUUAUUCUUCGCGA      |
| 26  | 3K17-1                 | At2g32510                     | UAUAACCACGUUACUACGCUU      |
| 27  | 3K17-2                 | At2g32510                     | UAUCCUUUUAGUAUUCGCGC       |
| 28  | 3K17-3                 | At2g32510                     | UAUAUCGCGCGUGUAGUCGACG     |
| 29  | 3K18-1                 | At1g05100                     | UUAAACUCACCUAAAUUUCGCU     |
| 30  | 3K18-2                 | At1g05100                     | UGUUUAGUAGUUGACUCGCUU      |
| 31  | 3K18-3                 | At1g05100                     | UUUAGAAUGUACUACAACCCU      |
| 32  | L YM2-1                | At2g17120                     | UUAGUUUGACUACAUGUGCGC      |
| 33  | L YM2-2                | At2g17120                     | UCGUUCAUUUUUUCACAGCUG      |
| 34  | L YM2-3                | At2g17120                     | UAUUGCGCAACGUUGUGGCGU      |
| 35  | L YM2-4                | At2g17120                     | UAAUCUGUACUAGAUACACAG      |
| 36  | L YM2-5                | At2g17120                     | UGUAAAACAGGAAGUUUCCCU      |
| 37  | L YM2-6                | At2g17120                     | UUAAAAUUGGUACGUGGACGCU     |
| 38  | L YM2-7                | At2g17120                     | UACAUAUACUAGAGAACGCGG      |
| 39  | L YM2-8                | At2g17120                     | UACAAGGACGUGAUGCGUCAG      |
| 40  | PDS3-1                 | At4g14210                     | UCAUUAGUUCACAACCCUGCAG     |
| 41  | PDS3-2                 | At4g14210                     | UUUGAUUAGGCAAAUUGGCCG      |
| 42  | PDS3-3                 | At4g14210                     | UGUAAACCAGUCUCAUAGCAG      |
| 43  | PDS3-4                 | At4g14210                     | UGUCUUAACGACAUGGUACGU      |
| 44  | PDS3-5                 | At4g14210                     | UCAUUAGUUCACAACCCCCAG      |
| 45  | PDS3-6                 | At4g14210                     | UCAUUAGUUCACAACCCGCG       |
| 46  | PDS3-7                 | At4g14210                     | UCAUUAGUUCACAACCUCCAG      |
| 47  | ZAT6-1                 | At5g04340                     | UAAACGUGCGACUUCACGCUU      |
| 48  | ZAT6-2                 | At5g04340                     | UAAUUCGACACGCUACUACUG      |
| 49  | ZAT6-3                 | At5g04340                     | UAAACGUGCGACUCCACACUU      |
| 50  | ZAT6-4                 | At5g04340                     | UUAAAGCGAAAAGCUUUUGCGG     |
| 51  | ZAT6-5                 | At5g04340                     | UAAAGCGAUUAUUGAUCCUC       |
| 52  | GFP-1                  | GFP                           | UUAGUGGUCGGCGAGCUGCAC      |
| 53  | GFP-2                  | GFP                           | UACACGCUGAACUUGUGGCCG      |
| 54  | GFP-3                  | GFP                           | UAAGAAGAUGGUGCGCUCUG       |
| 55  | GFP-4                  | GFP                           | UUGAUUAAGACGUUGUGGCCG      |
| 56  | RACK1-1                | At1g48630 At1g18080 At3g18130 | UUAGUAACGACCAACAGCCCA      |
| 57  | RACK1-2                | At1g48630 At1g18080 At3g18130 | UCAAAACGAGUCCUUCGGCAA      |
| 58  | RACK1-3                | At1g48630 At1g18080 At3g18130 | UCGUACGAUCACGACAUCCAG      |
| 59  | RACK1-4                | At1g48630 At1g18080 At3g18130 | UACGAAGUGAGAGUGACCAU       |
| 60  | AYG-1                  | At5g66850 At1g53570 At1g63700 | UGUGCCAUCAGUAGGGGCGU       |
| 61  | AYG-2                  | At5g66850 At1g53570 At1g63700 | UGUGCCAUCAGUAGGGGCGU       |
| 62  | AYG-3                  | At5g66850 At1g53570 At1g63700 | UGUGCCAUCAGUAGGGGCGU       |
| 63  | AYG-4                  | At5g66850 At1g53570 At1g63700 | UGUGCCAUCAGUAGGGGCGU       |
| 64  | miR319a                | At4g18390 At2g31070 At1g30210 | UUGGACUGAAGGGAGCUCUCCU     |
| 65  | miR319a <sup>129</sup> | N/A                           | UUGGACUGAAGAGAGCUCUCCU     |

## SUPPLEMENTAL METHODS 1

### Plasmid Construction

All plasmids used in this work are listed in the Supplemental Table 3 and are available upon request. For amiRNA/miRNA expression plasmids (Supplemental Table 3, No.1-64, No.130-133), the precursors for individual amiRNAs or miR319a<sup>129</sup> (Supplemental Table 5) were assembled by a two-step overlapping PCR method using *Arabidopsis* miR319a precursor or rice miR528 precursor as the template according to the instruction from WMD (<http://wmd3.weigelworld.org>). PCR products of pre-amiRNAs or pre-miR319a<sup>129</sup> were digested by *Bam*HI/*Pst*II and inserted into the same digested HBT vector (Yoo et al., 2007) that contains the 35S promoter for transient expression in plant protoplasts.

For plasmids constitutively expressing target gene (No.59-74), the full-length coding sequences of target genes were amplified by RT-PCR, digested by *Bam*HI/*Stu*I and inserted into the same digested HBT-2HA vector to express double HA tagged target proteins under the 35S promoter. For AGO expression plasmids (No. 81-85), the coding sequences of *AGO1* (isoforms *AGO1-1* and *AGO1-2*), *AGO2*, *AGO4* and *AGO10* were PCR amplified from *Arabidopsis* mesophyll protoplast cDNAs, digested by *Bam*HI/*Stu*I and inserted into the same digested HBT-2HA vector to express double HA tagged AGO proteins under the 35S promoter.

For plasmids inducibly expressing target gene (No.86-106), the heat shock protein 18.2 promoter (*HSP*) and the *Nos* terminator were PCR amplified from the template plasmid HSP18.2-LUC-NOS (GenBank ID: EF090413, Yoo et al., 2007), digested by *Eco*RI/*Bam*HI and *Pst*II/*Sma*I, respectively, and inserted into the same sites of the pUC119-RCS vector (Lee et al., 2008) to obtain the pUC119-HSP vector. The full-length coding sequences encoding HA-tagged target proteins were PCR amplified or directly cut out by *Bam*HI/*Pst*II from the HBT-based constitutive expression plasmids, and then inserted into the

*Bam*HI/*Pst*I site of the pUC119-HSP vector. Regarding the plasmid HSP-LYM2UTR-HA (No. 96), the full-length cDNA of *LYM2* (including both UTRs) was amplified by RT-PCR, digested and inserted into the pUC119-HSP vector. The HA tag coding sequence was then introduced behind the coding sequence of the signal peptide of *LYM2* (amino acids 1-23) through site-directed mutagenesis.

For plasmids expressing the “SUMO ladder” (No.107-109), the target site of amiR-*YDA-3*, amiR-*GAMMA-3* or amiR-*ALPHA-2* was included into the reverse primer to PCR the SUMO<sub>AA</sub> coding sequence, which expresses the SUMO protein with the last two glycines mutated to alanines to avoid potential post-translational cleavages between SUMO repeats. The PCR products were cloned into the *Bam*HI/*Stu*I site of the HBT-2HA vector. The second and the third SUMO<sub>AA</sub> coding sequences were sequentially inserted into the *Bam*HI site upstream the first SUMO<sub>AA</sub> coding sequence and the intended insertion orientation was confirmed by DNA sequencing.

For the plasmid expressing polycistronic amiRNAs (No.110), the second and the third pre-amiRNAs were PCR amplified and digested by *Bam*HI/*Bgl*II and sequentially inserted into the *Bam*HI site upstream the first pre-amiRNA within the HBT plasmid. For the plasmid expressing tandem amiRNAs (Supplemental Table 3, No.111), the first pre-amiRNA expression cassette (35S:*pre-amiRNA:Nos*) was PCR amplified and digested by *Stu*I/*Sma*I and inserted into the *Stu*I site of the pUC119-RCS vector. The PCR products of the second and the third pre-amiRNA expression cassettes were digested by *Stu*I/*Sma*I and sequentially inserted into the *Stu*I site upstream the first pre-amiRNA expression cassette in the pUC119-RCS vector. The correct pre-amiRNA assembling orientation in plasmids No.110 and 111 was confirmed by DNA sequencing. For the binary plasmid expressing polycistronic amiRNAs via tobacco leaf agro-infiltration (No. 112), the polycistronic pre-amiRNAs were extracted from the plasmid No. 110 by *Bam*HI/*Pst*I and inserted into the same cut pUC119-RCS vector containing a 35S promoter and a *Nos* terminator. The whole expression

cassette was then cut out by *Ascl* and inserted into the same digested pFGC binary vector. For the binary plasmid expressing tandem amiRNAs via tobacco leaf agro-infiltration (No. 113), the tandem pre-amiRNA expression cassettes were cut out from the plasmid No. 111 by *Ascl* and inserted into the same digested pFGC binary vector.

For binary plasmids expressing *YDA*, *ALPHA* or *GAMMA* via tobacco leaf agro-infiltration (No. 114-116), PCR products encoding HA-tagged *YDA*, *ALPHA* or *GAMMA* were cloned into the pUC119-RCS vector containing a 35S promoter and a *Nos* terminator. The whole expression cassette was then cut out by *Ascl* and inserted into the same digested pFGC binary vector. For binary plasmids expressing *GFP* or firefly luciferase (*LUC*) via tobacco leaf agro-infiltration (No. 117 and 118), the *GFP-HA* coding sequence extracted by *Bam*HI/*Pst*I from the plasmid No. 77 or the *Bam*HI/*Pst*I digested PCR products of *LUC* was inserted into the same digested pCB302 binary vector (Xiang et al., 1999).

For binary plasmids expressing amiR-*GFPs* via tobacco leaf agro-infiltration (No. 119-122), these pre-amiRNAs were respectively extracted from the plasmids No.52-55 by *Bam*HI/*Pst*I digestion, and then inserted into the same digested pCB302 binary vector.

For binary plasmids expressing amiRNAs in transgenic plants (No.123-128), the pre-amiRNA fragments were extracted from the HBT-based amiRNA expression plasmids by *Bam*HI/*Pst*I digestion and inserted into the same digested pCB302 binary vector. For the binary plasmid expressing the GFP-target sensor (No.129), the target sequence of amiR-*MEKK1-3* was introduced between *GFP* and the stop codon by PCR. The PCR products were digested by *Xba*I/*Not*I and inserted into the same digested pAN vector (Li and Nebenführ, 2007) containing a 35S promoter and a *Nos* terminator. The 35S:*GFP-Target<sub>amiR-MEKK1-3</sub>*:*Nos* expression cassette was then removed from the pAN vector by *Sac*I/*Eco*RV digestion and subcloned into the pUC119-RCS vector. The expression cassette was again

extracted by *I-CeuI/Ascl* digestion and inserted into the same digested binary vector pFGC19-XVE-RCS, which expresses the XVE transcription activator (Zuo et al., 2000) under the 35S promoter, to obtain the intermediate plasmid pFGC-GFP-Target. The *BamHI/PstI* fragment of pre-amiR-*MEKK1-3* was inserted between the estradiol-inducible promoter (Curtis and Grossniklaus, 2003) and the *Nos* terminator in a modified pUC119-RCS vector. The pre-amiR-*MEKK1-3* expression cassette was then extracted by *Ascl* digestion and inserted into the *Ascl* site of the intermediate plasmid pFGC-GFP-Target to obtain pFGC-amiR-*MEKK1*.

### **Tobacco Leaf Agro-infiltration**

Tobacco leaf agro-infiltration was conducted as previously described (Sparkes et al., 2006) with modifications. Briefly, overnight cultured agrobacteria GV3101 cells harboring correct binary vector were pelleted at 16,000 g for 30 sec and washed once with the infiltration solution (10 mM MES, pH 5.7, 10 mM MgCl<sub>2</sub>, 100 μM acetosyringone). *Agrobacterium* were resuspended with the infiltration solution and mixed to obtain a final OD<sub>600</sub> of 0.08 for those expressing amiRNA and 0.02 for those expressing the target gene or firefly luciferase (LUC, internal control). Before infiltration, intended infiltration zones on the underside of the third or fourth leaf of 6 weeks old tobacco plants were labeled with a marker pen. *Agrobacterium* cocktail was gently infiltrated into the marked infiltration zones using a 1-ml syringe without needle. At 72 hr post infiltration, a leaf disc was generated from each infiltration zone using a hole punch (diameter 6 mm). Three leaf discs from three infiltration repeats were powdered in a 1.5 ml microcentrifuge tube in liquid nitrogen bath by a rotor-stator homogenizer and were boiled with 50 μl 1×SDS loading buffer at 95°C for 10 min. Total proteins were subjected to SDS-PAGE and immunoblot analysis using anti-HA (Sigma) or anti-LUC (Santa Cruz Biotechnology) antibodies.

### **Bioinformatic Analysis**



Gene-specific amiRNA candidates were designed by the Web-based MicroRNA Designer (WMD, <http://wmd3.weigelworld.org>, Schwab et al., 2006) by inputting the gene identification number (for *Arabidopsis* gene) or the coding sequence (for *GFP*). PCR primers for generating a desired amiRNA were also designed through the “Oligo” platform on the WMD website by inputting the amiRNA sequence listed in the Supplemental Table 5. Target site accessibility was predicted by the Sfold server (<http://sfold.wadsworth.org>, Ding et al., 2004) using a 51-nt target region within the target gene covering the 21-nt target sequence and 17-nt upstream and 13-nt downstream sequences (Kertesz et al., 2007). Natural target genes for plant miRNAs were predicted through the following web servers or databases: TAPIR (<http://bioinformatics.psb.ugent.be/webtools/tapir>, Bonnet et al., 2010), WMD, UEA plant sRNA toolkit (<http://srna-tools.cmp.uea.ac.uk>, Moxon et al., 2008), starBase (<http://starbase.sysu.edu.cn>, Yang et al., 2011), psRNATarget (<http://plantgrn.noble.org/psRNATarget>, Dai and Zhao, 2011) and Plant microRNA database (PMRD, <http://bioinformatics.cau.edu.cn/PMRD>, Zhang et al., 2010).

## **SUPPLEMENTAL REFERENCES**

**Alves-Junior L, Niemeier S, Hauenschild A, Rehmsmeier M, Merkle T (2009)** Comprehensive prediction of novel microRNA targets in *Arabidopsis thaliana*. *Nucleic Acids Res* **37**: 4010-4021

**Bonnet E, He Y, Billiau K, Van de Peer Y (2010)** TAPIR, a web server for the prediction of plant microRNA targets, including target mimics. *Bioinformatics* **26**: 1566-1568

**Curtis MD, Grossniklaus U (2003)** A gateway cloning vector set for high-throughput functional analysis of genes in planta. *Plant Physiol* **133**: 462-469

**Dai X, Zhao PX (2011)** psRNATarget: A plant small RNA target analysis server. *Nucleic Acids Res* **39**: W155-W159

**Ding Y, Chan CY, Lawrence CE (2004)** Sfold web server for statistical folding and rational design of nucleic acids. *Nucleic Acids Res* **32**: W135-W141

**Jones-Rhoades MW, Bartel DP (2004)** Computational identification of plant microRNAs and their targets, including a stress-induced miRNA. *Mol Cell* **14**: 787-799

**Kertesz M, Iovino N, Unnerstall U, Gaul U, Segal E (2007)** The role of site accessibility in microRNA target recognition. *Nat Genet* **39**: 1278-1284

**Lee LY, Fang MJ, Kuang LY, Gelvin SB (2008)** Vectors for multi-color bimolecular fluorescence complementation to investigate protein-protein interactions in living plant cells. *Plant Methods* **4**: 24

Supplemental Data. Li et al. (2013). Plant Cell 10.1105/tpc.113.112235

**Li JF, Nebenführ A** (2007) Organelle targeting of myosin XI is mediated by two globular tail subdomains with separate cargo binding sites. J Biol Chem **282**: 20593-20602

**Moxon S, Schwach F, MacLean D, Dalmay T, Studholme DJ, Moulton V** (2008) A toolkit for analysing large-scale plant small RNA datasets. Bioinformatics **24**: 2252-2253

**Ossowski S, Schwab R, Weigel D** (2008) Gene silencing in plants using artificial microRNAs and other small RNAs. Plant J **53**: 674-690

**Palatnik JF, Allen E, Wu X, Schommer C, Schwab R, Carrington JC, Weigel D** (2003) Control of leaf morphogenesis by microRNAs. Nature **425**: 257-263

**Palatnik JF, Wollmann H, Schommer C, Schwab R, Boisbouvier J, Rodriguez R, Warthmann N, Allen E, Dezulian T, Huson D, Carrington JC, Weigel D** (2007) Sequence and expression differences underlie functional specialization of Arabidopsis microRNAs miR159 and miR319. Dev Cell **13**: 115-125

**Sparkes IA, Runions J, Kearns A, Hawes C** (2006) Rapid, transient expression of fluorescent fusion proteins in tobacco plants and generation of stably transformed plants. Nat Protocols **1**: 2019-2025

**Xiang CB, Han P, Lutziger I, Wang K, Oliver DJ** (1999) A mini binary vector series for plant transformation. Plant Mol Biol **40**: 711-717

**Yang JH, Li JH, Shao P, Zhou H, Chen YQ, Qu LH** (2011) starBase: a database for exploring microRNA-mRNA interaction maps from Argonaute CLIP-Seq and Degradome-Seq data. Nucleic Acids Res **39**: D202-D209

Supplemental Data. Li et al. (2013). Plant Cell 10.1105/tpc.113.112235

**Yoo SD, Cho YH, Sheen J** (2007) Arabidopsis mesophyll protoplasts: a versatile cell system for transient gene expression analysis. Nat Protocols **2**: 1565-1572

**Zhang Z, Yu J, Li D, Zhang Z, Liu F, Zhou X, Wang T, Ling Y, Su Z** (2010) PMRD: plant microRNA database. Nucleic Acids Res **38**: D806-D813

**Zuo J, Niu QW, Chua NH** (2000) An estrogen receptor-based transactivator XVE mediates highly inducible gene expression in transgenic plants. Plant J **24**: 265-273
